# Supplementary material for: Efficient three-component one-pot synthesis of fully substituted pyridin-2(1H)-ones via tandem Knoevenagel condensation–ring-opening of cyclopropane–intramolecular cyclization
Source: Royal Society of Chemistry journal article supplement (doi:10.1039/b905742k), 2009-01-01

## Supplementary Information

# Efficient three-component one-pot synthesis of fully substituted pyridin-2(1*H*)-ones via tandem Knoevenagel condensation/ring-opening of cyclopropane/intramolecular cyclization

Fushun Liang,\* Xin Cheng, Jing Liu, and Qun Liu

*Department of Chemistry, Northeast Normal University, Changchun, 130024 China*

liangfs112@nenu.edu.cn

### Table of contents

|                                                                                            |    |
|--------------------------------------------------------------------------------------------|----|
| I. General..                                                                               | S2 |
| II. Synthesis and analytical data of <b>2a-j</b> .....                                     | S2 |
| III. Synthesis and analytical data of <b>3a-f</b> .....                                    | S5 |
| VI. Synthesis and analytical data of <b>4b-c, 5a-c</b> .....                               | S7 |
| V. Copies of <sup>1</sup> H and <sup>13</sup> C NMR spectra for compounds <b>2-5</b> ..... | S9 |

## I. General

All reagents were purchased from commercial sources and used without treatment, unless otherwise indicated.  $^1\text{H}$  NMR and  $^{13}\text{C}$  NMR spectra were recorded at 25 °C on a 500 MHz and 125 MHz, respectively, and TMS as internal standard. Elemental analyses were measured on an E-2400 analyzer (Perkin-Elmer). Mass spectra were recorded on Agilent 1100 LCMsD mass spectrometer.

## II. Synthesis and analytical data of 2a-j.

The substituted acetylacetamide substrates **1**, were prepared according to procedures reported by our group. For reference, see: Z. Zhang, Q. Zhang, S. Sun, T. Xiong, Q. Liu, *Angew. Chem. Int. Ed.* 2007, **46**, 1726–1729; and Pan, W.; Dong, D.; Wang, K.; Zhang, J.; Wu, R.; Xiang, D.; Liu, Q. *Org. Lett.* **2007**, *9*, 2421–2423.

General procedure for the preparation of **2** (**2a** as an example): 2 mmol 1-acetyl-*N*-phenylcyclopropanecarboxamide was dispensed in 5 ml DMF. 1.1 mmol malononitrile was added at room temperature, and then 2 mmol piperidine was added and stirring for 2.5 hours. After the starting material **1a** was consumed as indicated by TLC, the reaction mixture was extracted with  $\text{CH}_2\text{Cl}_2$  ( $3 \times 10$  mL). The combined organic phase was washed with water ( $3 \times 20$  mL), dried over  $\text{MgSO}_4$ , filtered and concentrated in *vacuo*. The crude product was purified by recrystallization in ethanol.

### 2-amino-4-methyl-6-oxo-1-phenyl-5-(2-(piperidin-1-yl)ethyl)-1,6-dihydropyridine-3-carbonitrile (**2a**)

White solid. m.p. 148-150 °C.  $^1\text{H}$  NMR ( $\text{CDCl}_3$ , 500 MHz)  $\delta$  = 1.42 (s, 2H), 1.56-1.59 (m, 4H), 2.34 (s, 3H), 2.38-2.41 (m, 4H), 2.47 (s, 4H), 2.69-2.72 (m, 2H), 4.83 (s, 2H), 7.25-7.27 (m, 2H), 7.53 (d,  $J$  = 7.5 Hz, 1H), 7.57-7.60 (m, 2H).  $^{13}\text{C}$  NMR ( $\text{CDCl}_3$ , 125 MHz)  $\delta$  = 17.7, 23.8, 24.0, 25.6, 54.0, 57.2, 73.0, 116.4, 117.3, 128.0, 129.7, 130.3, 134.2, 146.45, 152.9, 161.0. MS calcd  $m/z$  336.2, Found 337.2  $[(M + 1)]^+$ . Anal. Calcd for  $\text{C}_{20}\text{H}_{24}\text{N}_4\text{O}$ : C, 71.40; H, 7.19; N, 16.65; Found: C, 71.84; H, 7.04; N, 16.28.

**2-amino-1-(4-chlorophenyl)-4-methyl-6-oxo-5-(2-(piperidin-1-yl)ethyl)-1,6-dihydropyridine-3-carbonitrile (2b)**

White solid. m.p. 164-166 °C. <sup>1</sup>H NMR (CDCl<sub>3</sub>, 500 MHz) δ = 1.43 (s, 2H), 1.58 (t, *J* = 5.5 Hz, 4H), 2.34 (s, 3H), 2.36-2.40 (m, 2H), 2.47 (s, 4H), 2.70 (t, *J* = 8.0 Hz, 2H), 4.78 (s, 2H), 7.22 (d, *J* = 8.5 Hz, 2H), 7.57 (d, *J* = 8.0 Hz, 2H). <sup>13</sup>C NMR (DMSO-*d*<sub>6</sub>, 125 MHz) δ = 17.7, 23.9, 24.1, 25.6, 53.9, 57.3, 71.4, 113.4, 117.9, 130.1, 130.9, 133.9, 134.2, 147.0, 154.3, 160.8. MS calcd *m/z* 370.2, Found 371.2 [(M + 1)]<sup>+</sup>. Anal. Calcd for C<sub>20</sub>H<sub>23</sub>ClN<sub>4</sub>O: C, 64.77; H, 6.25; N, 15.11; Found: C, 64.88; H, 6.55; N, 14.89.

**2-amino-4-methyl-6-oxo-5-(2-(piperidin-1-yl)ethyl)-1-p-tolyl-1,6-dihydropyridine-3-carbonitrile (2c)**

White solid. m.p. 176-178 °C. <sup>1</sup>H NMR (CDCl<sub>3</sub>, 500 MHz) δ = 1.42 (s, 2H), 1.56-1.59 (m, 4H), 2.33 (s, 3H), 2.39-2.42 (m, 5H), 2.48 (s, 4H), 2.69-2.72 (m, 2H), 4.80 (s, 2H), 7.13 (d, *J* = 8.0 Hz, 2H), 7.38 (d, *J* = 8.0 Hz, 2H). <sup>13</sup>C NMR (CDCl<sub>3</sub>, 125 MHz) δ = 17.9, 21.2, 24.0, 24.3, 25.8, 54.2, 57.4, 73.2, 116.5, 117.6, 127.8, 131.2, 131.6, 140.2, 146.6, 153.3, 161.4. MS calcd *m/z* 350.2, Found 351.2 [(M + 1)]<sup>+</sup>. Anal. Calcd for C<sub>21</sub>H<sub>26</sub>N<sub>4</sub>O: C, 71.97; H, 7.48; N, 15.99; Found: C, 71.84; H, 7.04; N, 16.28.

**2-amino-1-(2,4-dimethylphenyl)-4-methyl-6-oxo-5-(2-(piperidin-1-yl)ethyl)-1,6-dihydropyridine-3-carbonitrile (2d)**

White solid. m.p. 118-120 °C. <sup>1</sup>H NMR (CDCl<sub>3</sub>, 500 MHz) δ = 1.42 (s, 2H), 1.57 (t, *J* = 5.5 Hz, 4H), 2.05 (s, 3H), 2.34 (s, 3H), 2.38-2.41 (m, 5H), 2.47 (s, 4H), 2.69-2.72 (m, 2H), 4.83 (s, 2H), 7.02 (d, *J* = 8.0 Hz, 1H), 7.18 (d, *J* = 8.0 Hz, 1H), 7.27 (s, 1H). <sup>13</sup>C NMR (CDCl<sub>3</sub>, 125 MHz) δ = 17.0, 17.9, 21.1, 24.0, 24.3, 25.8, 54.2, 57.4, 72.9, 116.5, 117.7, 127.7, 130.6, 132.7, 135.6, 140.3, 146.6, 153.0, 160.8. MS calcd *m/z* 364.2, Found 365.2 [(M + 1)]<sup>+</sup>. Anal. Calcd for C<sub>22</sub>H<sub>28</sub>N<sub>4</sub>O: C, 72.50; H, 7.74; N, 15.37; Found: C, 72.42; H, 7.58; N, 15.45.

**2-amino-4-methyl-6-oxo-1-phenyl-5-(2-(piperidin-1-yl)propyl)-1,6-dihydropyridine-3-carbonitrile (2f)**

White solid. m.p. 74-76 °C. <sup>1</sup>H NMR (CDCl<sub>3</sub>, 500 MHz) δ = 0.98 (d, *J* = 6.5 Hz,

3H), 1.42 (d,  $J = 5.0$  Hz, 2H), 1.50–1.56 (m, 4H), 2.34 (s, 3H), 2.38–2.46 (m, 1H), 2.56 (d,  $J = 5.5$  Hz, 4H), 2.75–2.78 (m, 1H), 2.80 (d,  $J = 6.5$  Hz, 1H), 4.77 (s, 2H), 7.24–7.27 (m, 2H), 7.53 (t,  $J = 7.5$  Hz, 1H), 7.59 (t,  $J = 7.5$  Hz, 2H).  $^{13}\text{C}$  NMR ( $\text{CDCl}_3$ , 125 MHz)  $\delta = 15.2, 18.5, 24.8, 26.4, 29.1, 49.6, 59.3, 73.5, 117.7, 128.2, 128.3, 130.1, 130.7, 134.5, 146.7, 153.0, 161.6$ . MS calcd  $m/z$  350.2, Found 351.2 [(M + 1)]<sup>+</sup>. Anal. Calcd for  $\text{C}_{21}\text{H}_{26}\text{N}_4\text{O}$ : C, 71.97; H, 7.48; N, 15.99; Found: C, 71.59; H, 7.19; N, 16.11.

**2-amino-4-methyl-5-(2-morpholinoethyl)-6-oxo-1-phenyl-1,6-dihydropyridine-3-carbonitrile (2g)**

White solid. m.p. 222–224 °C.  $^1\text{H}$  NMR ( $\text{CDCl}_3$ , 500 MHz)  $\delta = 2.34$  (s, 3H), 2.41–2.44 (m, 2H), 2.52 (s, 4H), 2.68–2.71 (m, 2H), 3.70 (t,  $J = 5.0$  Hz, 4H), 4.90 (s, 2H), 7.25 (d,  $J = 8.0$  Hz, 2H), 7.54 (d,  $J = 7.5$  Hz, 1H), 7.58–7.61 (m, 2H).  $^{13}\text{C}$  NMR ( $\text{CDCl}_3$ , 125 MHz)  $\delta = 18.0, 23.9, 53.4, 57.0, 66.8, 73.3, 116.1, 117.5, 128.2, 130.0, 130.6, 134.3, 146.9, 157.2, 161.3$ . MS calcd  $m/z$  338.2, Found 339.2 [(M + 1)]<sup>+</sup>. Anal. Calcd for  $\text{C}_{19}\text{H}_{22}\text{N}_4\text{O}_2$ : C, 67.44; H, 6.55; N, 16.56; Found: C, 67.82; H, 6.31; N, 16.28.

**2-amino-1-(2,4-dimethylphenyl)-4-methyl-5-(2-morpholinoethyl)-6-oxo-1,6-dihydropyridine-3-carbonitrile (2h)**

White solid. m.p. 200–202 °C.  $^1\text{H}$  NMR ( $\text{CDCl}_3$ , 500 MHz)  $\delta = 2.06$  (s, 3H), 2.34 (s, 3H), 2.38 (s, 3H), 2.40–2.44 (m, 2H), 2.52 (d,  $J = 2.5$  Hz, 4H), 2.71 (t,  $J = 7.5$  Hz, 2H), 3.70 (t,  $J = 4.5$  Hz, 4H), 4.81 (s, 2H), 7.03 (d,  $J = 7.5$  Hz, 1H), 7.19 (d,  $J = 8.0$  Hz, 1H), 7.23 (s, 1H).  $^{13}\text{C}$  NMR ( $\text{CDCl}_3$ , 125 MHz)  $\delta = 17.0, 17.9, 21.1, 23.8, 53.4, 57.1, 66.8, 72.9, 116.0, 117.6, 127.7, 128.7, 130.5, 132.8, 135.6, 140.4, 146.7, 153.1, 160.8$ . MS calcd  $m/z$  366.2, Found 369.2 [(M + 1)]<sup>+</sup>. Anal. Calcd for  $\text{C}_{19}\text{H}_{22}\text{N}_4\text{O}_2$ : C, 68.83; H, 7.15; N, 15.29; Found: C, 68.49; H, 7.04; N, 15.34.

**2-amino-1-(2-chlorophenyl)-4-methyl-5-(2-morpholinoethyl)-6-oxo-1,6-dihydropyridine-3-carbonitrile (2i)**

White solid. m.p. 218–220 °C.  $^1\text{H}$  NMR ( $\text{DMSO}-d_6$ , 500 MHz)  $\delta = 2.23$  (s, 3H), 2.25 (s, 2H), 2.37 (s, 4H), 2.52 (t,  $J = 7.5$  Hz, 2H), 3.54 (t,  $J = 4.5$  Hz, 4H), 6.82 (s, 2H), 7.38–7.40 (m, 1H), 7.49–7.53 (m, 2H), 7.66–7.67 (m, 1H).  $^{13}\text{C}$  NMR ( $\text{CDCl}_3$ , 125

MHz)  $\delta$  = 18.3, 24.2, 53.8, 57.6, 66.8, 71.8, 113.7, 118.3, 129.5, 131.1, 131.6, 131.8, 132.5, 133.3, 147.9, 150.5, 160.6. MS calcd  $m/z$  372.1, Found 373.1 [(M + 1)]<sup>+</sup>. Anal. Calcd for C<sub>19</sub>H<sub>21</sub>ClN<sub>4</sub>O<sub>2</sub>: C, 61.21; H, 5.68; N, 15.03; Found: C, 61.49; H, 5.49; N, 15.29.

**2-amino-1-(2,4-dimethylphenyl)-4-methyl-6-oxo-5-(2-(pyrrolidin-1-yl)ethyl)-1,6-dihydropyridine-3-carbonitrile (2j)**

White solid. m.p. 166-168 °C. <sup>1</sup>H NMR (CDCl<sub>3</sub>, 500 MHz)  $\delta$  = 1.78 (s, 4H), 2.05 (s, 3H), 2.35 (s, 3H), 2.38 (s, 3H), 2.52-2.55 (m, 2H), 2.60 (s, 4H), 2.73-2.76 (m, 2H), 4.83 (s, 2H), 7.03 (d,  $J$  = 8.0 Hz, 1H), 7.18 (d,  $J$  = 7.5 Hz, 1H), 7.22 (s, 1H). <sup>13</sup>C NMR (CDCl<sub>3</sub>, 125 MHz)  $\delta$  = 17.0, 17.9, 21.1, 23.3, 26.2, 53.8, 54.5, 73.0, 116.1, 117.6, 127.7, 128.7, 130.6, 132.7, 135.6, 140.4, 146.8, 153.1, 160.9. MS calcd  $m/z$  350.2, Found 351.2 [(M + 1)]<sup>+</sup>. Anal. Calcd for C<sub>21</sub>H<sub>26</sub>N<sub>4</sub>O: C, 71.97; H, 7.48; N, 15.99; Found: C, 72.22; H, 7.58; N, 15.45.

**III. Synthesis and analytical data of 3a-f.**

General procedure for the preparation of **3** (**3a** as an example): 2 mmol 1-acetyl-*N*-phenylcyclopropanecarboxamide was dispensed in 5 ml DMF. 2.1 mmol malononitrile was added at room temperature, and then 0.2 mmol piperidine was added and stirring for 2.5 hours. After the starting material **1a** was consumed as indicated by TLC, the reaction mixture was extracted with CH<sub>2</sub>Cl<sub>2</sub> (3 × 10 mL). The combined organic phase was washed with water (3 × 20 mL), dried over MgSO<sub>4</sub>, filtered and concentrated in *vacuo*. The crude product was purified by recrystallization in ethanol.

**2-(2-(6-amino-5-cyano-4-methyl-2-oxo-1-phenyl-1,2-dihydropyridin-3-yl)ethyl)malononitrile (3a)**

White solid. m.p. 219-221 °C. <sup>1</sup>H NMR (DMSO-*d*<sub>6</sub>, 500 MHz)  $\delta$  = 2.04-2.09 (m, 2H), 2.25 (s, 3H), 2.59 (t,  $J$  = 7.5 Hz, 2H), 4.74 (t,  $J$  = 6.5 Hz, 1H), 6.56 (s, 2H), 7.23 (d,  $J$  = 7.0 Hz, 2H), 7.50-7.57 (m, 3H). <sup>13</sup>C NMR (DMSO-*d*<sub>6</sub>, 125 MHz)  $\delta$  = 17.66, 21.91, 23.50, 28.63, 71.84, 112.39, 114.48, 117.76, 128.73, 129.46, 130.15, 135.03, 147.80,

154.59, 161.04. MS calcd  $m/z$  317.1, Found 318.1  $[(M + 1)]^+$ . Anal. Calcd for  $C_{18}H_{15}N_5O$ : C, 68.13; H, 4.76; N, 22.07; Found: C, 68.39; H, 4.59; N, 21.96.

**2-(2-(6-amino-1-(4-chlorophenyl)-5-cyano-4-methyl-2-oxo-1,2-dihydropyridin-3-yl)ethyl)malononitrile (3b)**

White solid. m.p. 158-160 °C.  $^1H$  NMR (DMSO- $d_6$ , 500 MHz)  $\delta$  = 2.05 (d,  $J$  = 6.5 Hz, 2H), 2.23 (s, 3H), 2.57 (t,  $J$  = 7.0 Hz, 2H), 4.67 (s, 1H), 6.75 (s, 2H), 7.25 (d,  $J$  = 8.5 Hz, 2H), 7.59 (d,  $J$  = 8.5 Hz, 2H).  $^{13}C$  NMR (DMSO- $d_6$ , 125 MHz)  $\delta$  = 17.9, 22.1, 23.6, 28.9, 71.2, 112.4, 114.7, 118.0, 130.5, 131.0, 134.2, 134.4, 148.5, 154.8, 161.3. MS calcd  $m/z$  351.1, Found 352.1  $[(M + 1)]^+$ . Anal. Calcd for  $C_{18}H_{14}ClN_5O$ : C, 61.46; H, 4.01; N, 19.91; Found: C, 61.22; H, 4.12; N, 19.99.

**2-(2-(6-amino-5-cyano-4-methyl-2-oxo-1-p-tolyl-1,2-dihydropyridin-3-yl)ethyl)malononitrile (3c)**

White solid. m.p. 202-204 °C.  $^1H$  NMR (DMSO- $d_6$ , 500 MHz)  $\delta$  = 1.99-2.08 (m, 2H), 2.24 (s, 3H), 2.38 (s, 3H), 2.58 (t,  $J$  = 7.5 Hz, 2H), 4.75 (t,  $J$  = 6.5 Hz, 1H), 6.54 (s, 2H), 7.10 (d,  $J$  = 8.0 Hz, 2H), 7.35 (d,  $J$  = 8.0 Hz, 2H).  $^{13}C$  NMR (DMSO- $d_6$ , 125 MHz)  $\delta$  = 17.6, 20.8, 21.8, 23.5, 28.6, 71.7, 112.3, 114.4, 117.7, 128.4, 130.6, 132.3, 138.8, 147.6, 154.7, 161.0. MS calcd  $m/z$  331.1, Found 332.1  $[(M + 1)]^+$ . Anal. Calcd for  $C_{19}H_{17}N_5O$ : C, 68.87; H, 5.17; N, 21.13; Found: C, 68.50; H, 5.33; N, 21.01.

**2-(2-(6-amino-5-cyano-1-(2,4-dimethylphenyl)-4-methyl-2-oxo-1,2-dihydropyridin-3-yl)ethyl)malononitrile (3d)**

White solid. m.p. 176-178 °C.  $^1H$  NMR (DMSO- $d_6$ , 500 MHz)  $\delta$  = 1.89 (s, 3H), 2.02-2.07 (m, 2H), 2.58 (t,  $J$  = 7.5 Hz, 2H), 4.69 (d,  $J$  = 6.0 Hz, 1H), 6.53 (s, 2H), 6.98 (d,  $J$  = 8.0 Hz, 1H), 7.15 (d,  $J$  = 8.0 Hz, 1H), 7.22 (s, 1H).  $^{13}C$  NMR (DMSO- $d_6$ , 125 MHz)  $\delta$  = 17.4, 18.4, 21.5, 22.6, 24.3, 29.3, 72.5, 113.1, 115.1, 118.5, 129.0, 129.2, 132.0, 132.8, 136.1, 139.8, 148.8, 155.0, 161.3. MS calcd  $m/z$  345.2, Found 346.2  $[(M + 1)]^+$ . Anal. Calcd for  $C_{20}H_{19}N_5O$ : C, 69.55; H, 5.54; N, 20.28; Found: C, 69.26; H, 5.33; N, 20.55.

**2-(1-(6-amino-5-cyano-4-methyl-2-oxo-1-phenyl-1,2-dihydropyridin-3-yl)propan-2-yl)malononitrile (3e)**

White solid. m.p. 170-172 °C.  $^1H$  NMR (DMSO- $d_6$ , 500 MHz)  $\delta$  = 1.06 (d,  $J$  = 6.5

Hz, 3H), 2.23 (s, 3H), 2.40-2.42 (m, 1H), 2.45-2.50 (m, 1H), 2.55 (t,  $J = 7.0$  Hz, 1H), 4.71 (d,  $J = 4.0$  Hz, 1H), 6.54 (s, 2H), 7.20-7.26 (m, 2H), 7.51 (d,  $J = 7.0$  Hz, 1H), 7.55 (t,  $J = 7.5$  Hz, 2H).  $^{13}\text{C}$  NMR (DMSO- $d_6$ , 125 MHz)  $\delta = 17.5, 18.7, 28.8, 31.1, 35.2, 72.7, 112.4, 114.2, 114.7, 118.5, 129.3, 129.5, 130.2, 130.9, 135.7, 149.2, 155.3, 162.1$ . MS calcd  $m/z$  331.1, Found 332.1  $[(M + 1)]^+$ . Anal. Calcd for  $\text{C}_{19}\text{H}_{17}\text{N}_5\text{O}$ : C, 68.87; H, 5.17; N, 21.13; Found: C, 68.39; H, 4.99; N, 21.01.

**2-(2-(6-amino-1-(2-chlorophenyl)-5-cyano-4-methyl-2-oxo-1,2-dihydropyridin-3-yl)ethyl)malononitrile (3f)**

White solid. m.p. 162-164 °C.  $^1\text{H}$  NMR (DMSO- $d_6$ , 500 MHz)  $\delta = 2.24$ -2.30 (m, 2H), 2.40 (s, 3H), 2.79-2.84 (m, 2H), 3.83 (t,  $J = 7.5$  Hz, 1H), 4.90 (s, 2H), 7.36 (d,  $J = 7.0$  Hz, 1H), 7.51-7.54 (m, 2H), 7.66-7.67 (m, 1H).  $^{13}\text{C}$  NMR (DMSO- $d_6$ , 125 MHz)  $\delta = 18.2, 22.4, 24.0, 29.0, 72.1, 112.4, 114.9, 118.1, 129.2, 129.9, 131.1, 131.5, 133.1, 135.5, 149.0, 154.8, 160.6$ . MS calcd  $m/z$  351.1, Found 352.1  $[(M + 1)]^+$ . Anal. Calcd for  $\text{C}_{18}\text{H}_{14}\text{ClN}_5\text{O}$ : C, 61.46; H, 4.01; N, 19.91; Found: C, 61.67; H, 3.89; N, 19.69.

**IV. Synthesis and analytical data of 4b-c, 5a-c.**

Similar procedure as that of **2a-k** was applied for the preparation of **4a-c** and **5a-c**.

**9-(4-chlorophenyl)-8-imino-6-methyl-10-oxospiro[4.5]dec-6-ene-7-carbonitrile (4b)**

White solid. m.p. 156-158 °C.  $^1\text{H}$  NMR ( $\text{CDCl}_3$ , 500 MHz)  $\delta = 1.86$  (s, 2H), 1.97 (d,  $J = 5.0$  Hz, 2H), 2.06 (s, 2H), 2.29 (s, 2H), 2.37 (s, 3H), 7.04 (s, 4H), 7.42 (s, 1H).  $^{13}\text{C}$  NMR ( $\text{CDCl}_3$ , 125 MHz)  $\delta = 19.2, 28.2, 39.2, 54.9, 107.3, 113.7, 121.97, 129.9, 130.2, 143.2, 144.1, 167.5, 174.4$ . MS calcd  $m/z$  312.1, Found 313.1  $[(M + 1)]^+$ . Anal. Calcd for  $\text{C}_{18}\text{H}_{17}\text{ClN}_2\text{O}$ : C, 69.12; H, 5.48; N, 8.96; Found: C, 69.39; H, 5.22; N, 8.77.

**8-imino-9-(4-methoxyphenyl)-6-methyl-10-oxospiro[4.5]dec-6-ene-7-carbonitrile (4c)**

White solid. m.p. 152-154 °C.  $^1\text{H}$  NMR ( $\text{CDCl}_3$ , 500 MHz)  $\delta = 1.86$  (s, 2H), 1.97 (d,  $J = 5.0$  Hz, 2H), 2.06 (s, 2H), 2.29 (s, 2H), 2.37 (s, 3H), 3.85 (s, 3H), 7.04 (s, 4H),

7.42 (s, 1H).  $^{13}\text{C}$  NMR ( $\text{CDCl}_3$ , 125 MHz)  $\delta = 19.4, 28.6, 39.5, 55.1, 55.8, 107.8, 115.3, 122.0, 129.9, 138.8, 143.3, 144.1, 157.2, 167.0, 174.6$ . MS calcd  $m/z$  308.2, Found 309.2  $[(\text{M} + 1)]^+$ . Anal. Calcd for  $\text{C}_{19}\text{H}_{20}\text{N}_2\text{O}_2$ : C, 74.00; H, 6.54; N, 9.08; Found: C, 73.88; H, 6.39; N, 8.89.

**4,4-dicyano-2,2-diethyl-3-methyl-N-phenylbut-3-enamide (5a)**

White solid. m.p. 160-162 °C.  $^1\text{H}$  NMR ( $\text{CDCl}_3$ , 500 MHz)  $\delta = 0.83$  (t,  $J = 7.0$  Hz, 6H), 1.77–1.85 (m, 2H), 2.18–2.23 (m, 2H), 2.33 (s, 3H), 7.11 (d,  $J = 7.0$  Hz, 2H), 7.42 (s, 1H), 7.42-7.85 (m, 3H).  $^{13}\text{C}$  NMR ( $\text{CDCl}_3$ , 125 MHz)  $\delta = 8.2, 16.5, 31.0, 55.1, 110.0, 112.6, 127.6, 128.6, 129.2, 132.1, 150.1, 162.9, 170.3$ . MS calcd  $m/z$  281.2, Found 282.2  $[(\text{M} + 1)]^+$ . Anal. Calcd for  $\text{C}_{17}\text{H}_{19}\text{N}_3\text{O}$ : C, 72.57; H, 6.81; N, 14.94; Found: C, 72.39; H, 6.99; N, 14.66.

**N-(4-chlorophenyl)-1-(1,1-dicyanoprop-1-en-2-yl)cyclopentanecarboxamide (5b)**

White solid. m.p. 180-182 °C.  $^1\text{H}$  NMR ( $\text{CDCl}_3$ , 500 MHz)  $\delta = 1.87$  (d,  $J = 6.0$  Hz, 2H), 1.91–1.95 (m, 2H), 2.04 (d,  $J = 6.5$  Hz, 2H), 2.19-2.23 (m, 2H), 2.35 (s, 3H), 6.82 (d,  $J = 8.5$  Hz, 2H), 7.34 (d,  $J = 8.5$  Hz, 2H), 7.65 (s, 1H).  $^{13}\text{C}$  NMR ( $\text{CDCl}_3$ , 125 MHz)  $\delta = 19.2, 28.2, 39.2, 54.9, 107.3, 113.7, 122.0, 129.9, 130.2, 143.2, 144.1, 167.5, 174.4$ . MS calcd  $m/z$  313.1, Found 314.1  $[(\text{M} + 1)]^+$ . Anal. Calcd for  $\text{C}_{17}\text{H}_{16}\text{ClN}_3\text{O}$ : C, 65.07; H, 5.14; N, 13.39; Found: C, 64.95; H, 4.98; N, 13.41.

**1-(1,1-dicyanoprop-1-en-2-yl)-N-(4-methoxyphenyl)cyclopentanecarboxamide (5c)**

White solid. m.p. 170-172 °C.  $^1\text{H}$  NMR ( $\text{CDCl}_3$ , 500 MHz)  $\delta = 1.86$  (d,  $J = 6.5$  Hz, 2H), 1.89–1.96 (m, 2H), 2.04 (d,  $J = 5.5$  Hz, 2H), 2.20-2.25 (m, 2H), 2.34 (s, 3H), 3.81 (s, 3H), 6.82 (d,  $J = 9.0$  Hz, 2H), 6.91 (d,  $J = 9.0$  Hz, 2H), 7.77 (s, 1H).  $^{13}\text{C}$  NMR ( $\text{CDCl}_3$ , 125 MHz)  $\delta = 19.4, 28.6, 39.5, 55.1, 55.8, 107.8, 115.3, 122.0, 130.0, 138.8, 143.3, 144.1, 157.2, 167.0, 174.6$ . MS calcd  $m/z$  309.2, Found 310.2  $[(\text{M} + 1)]^+$ . Anal. Calcd for  $\text{C}_{18}\text{H}_{19}\text{N}_3\text{O}_2$ : C, 69.88; H, 6.19; N, 13.58; Found: C, 69.59; H, 6.22; N, 13.41.



## V. Copies of $^1\text{H}$ and $^{13}\text{C}$ NMR spectra for compounds 2-5

### 2a

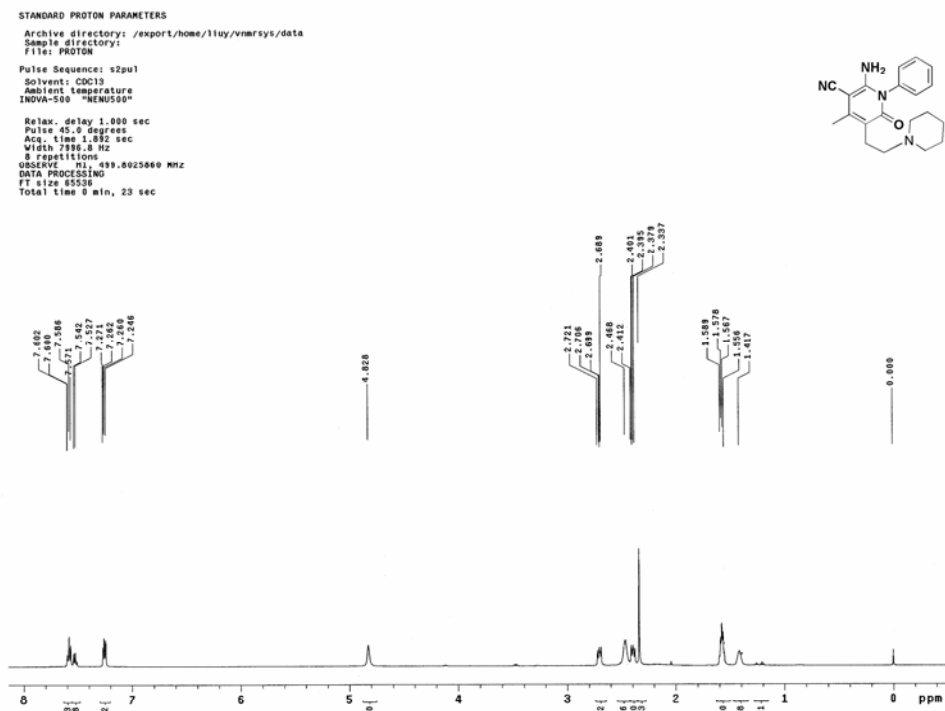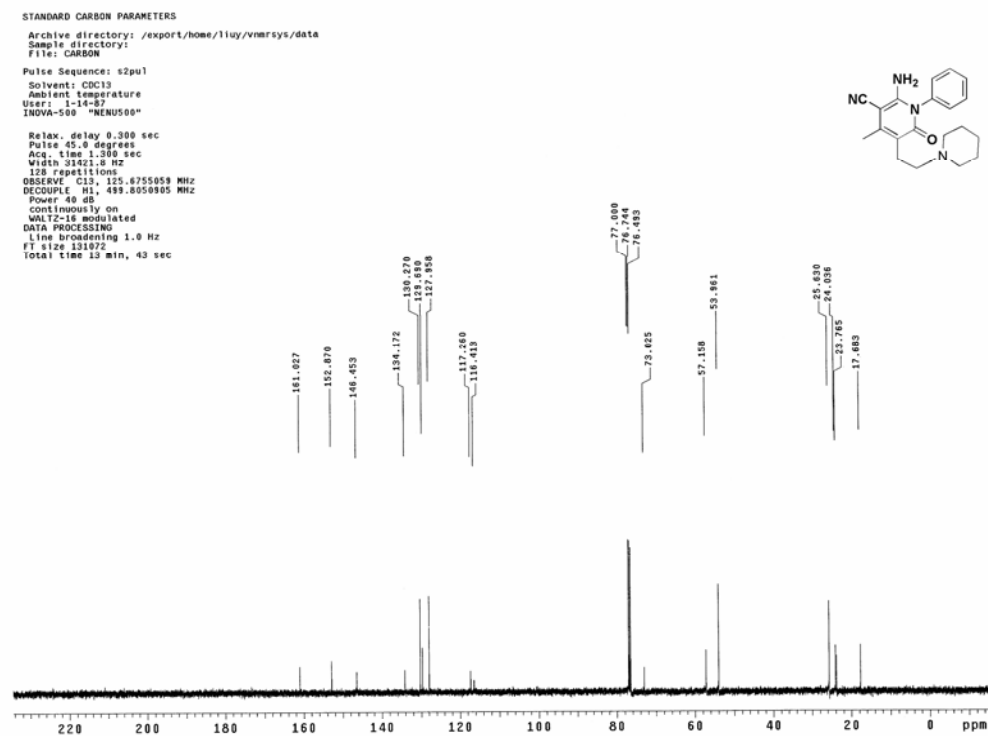

2b

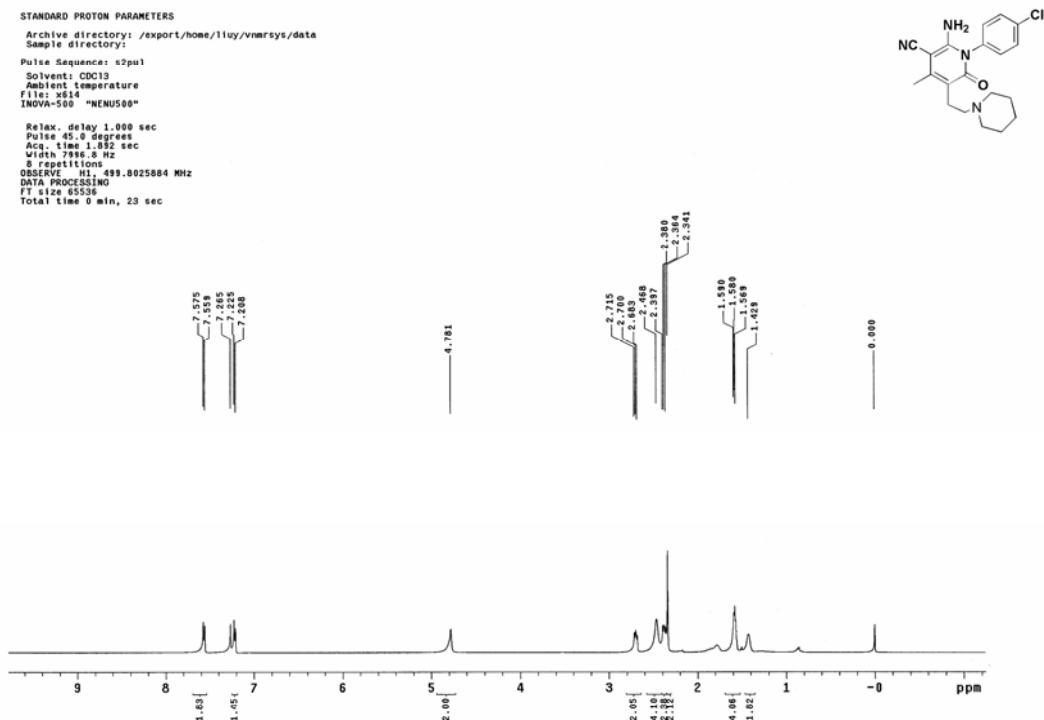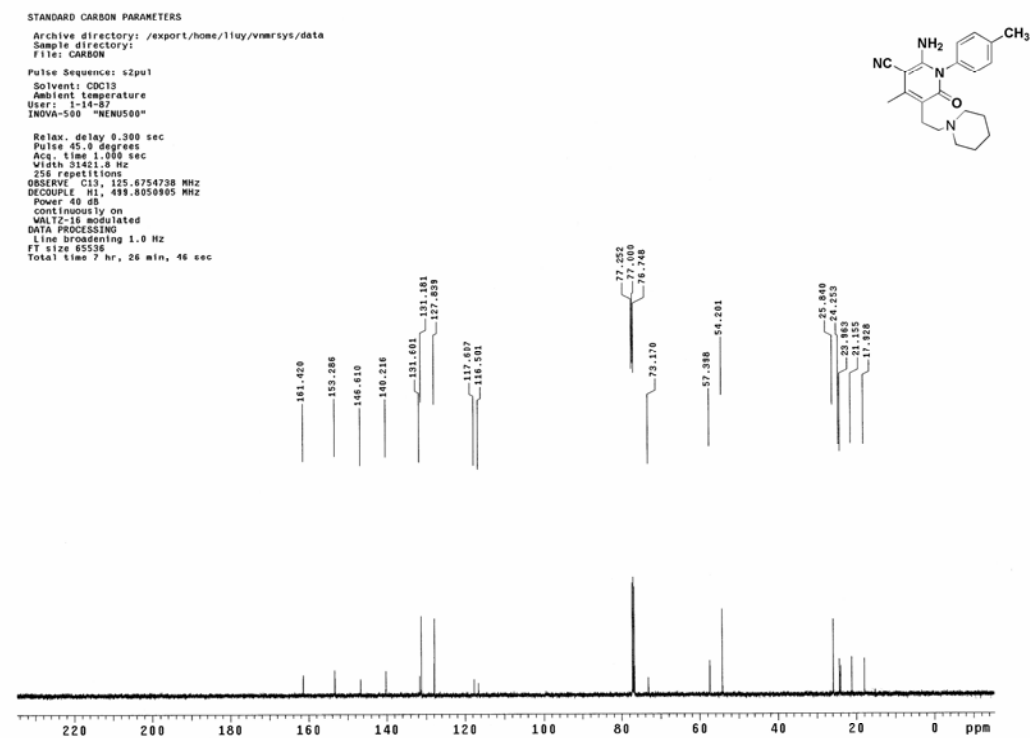

2c

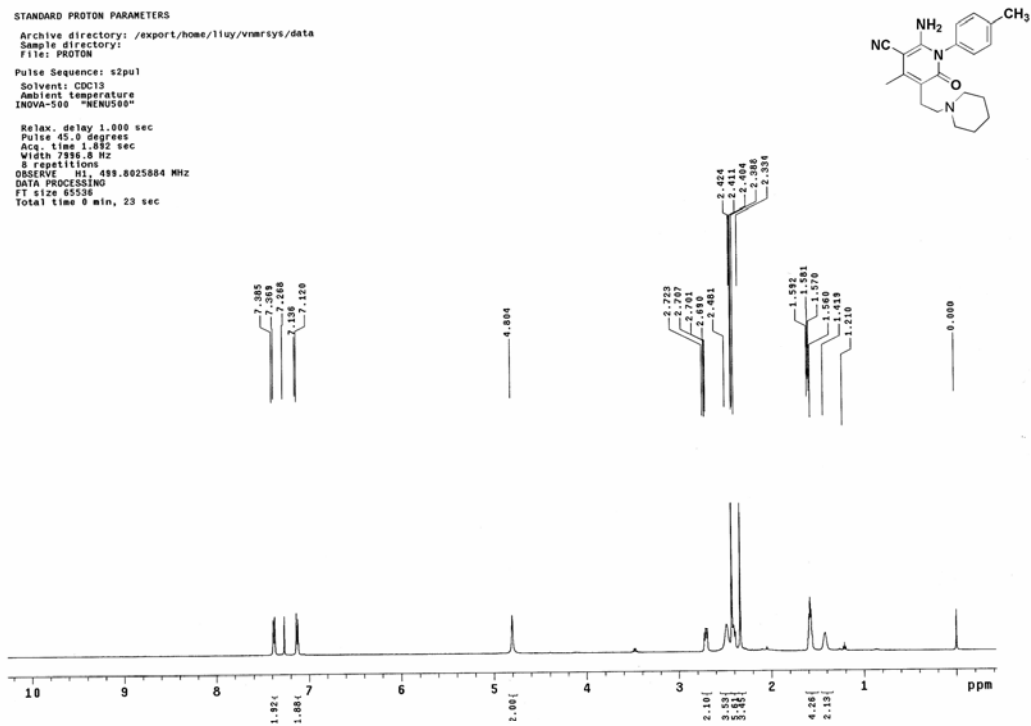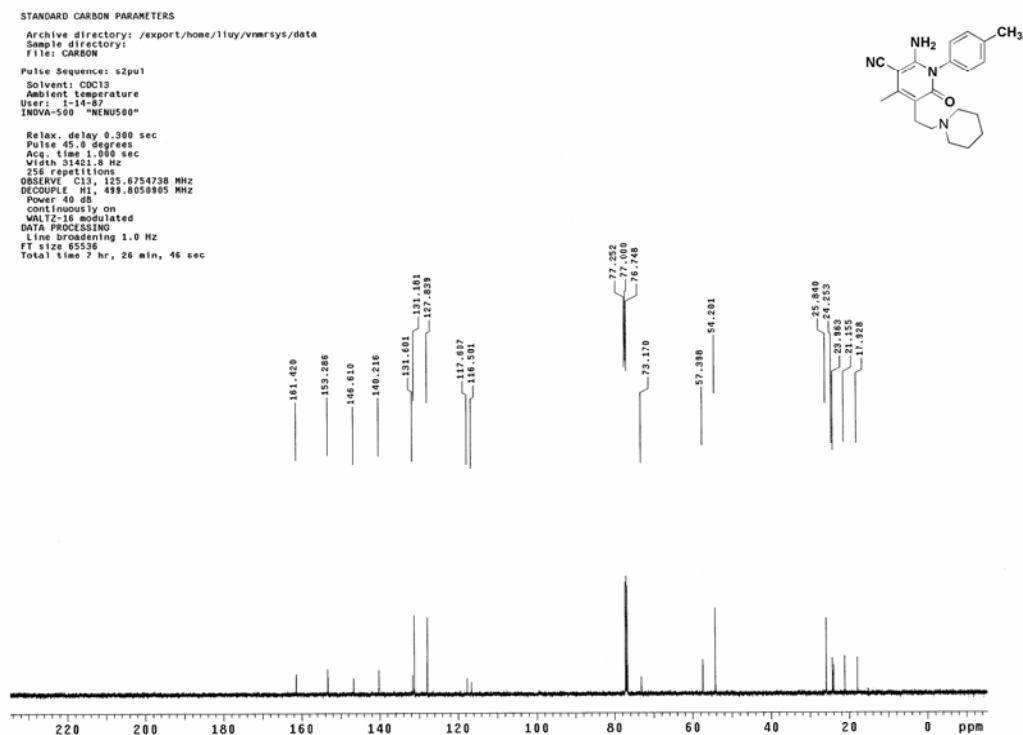

2d

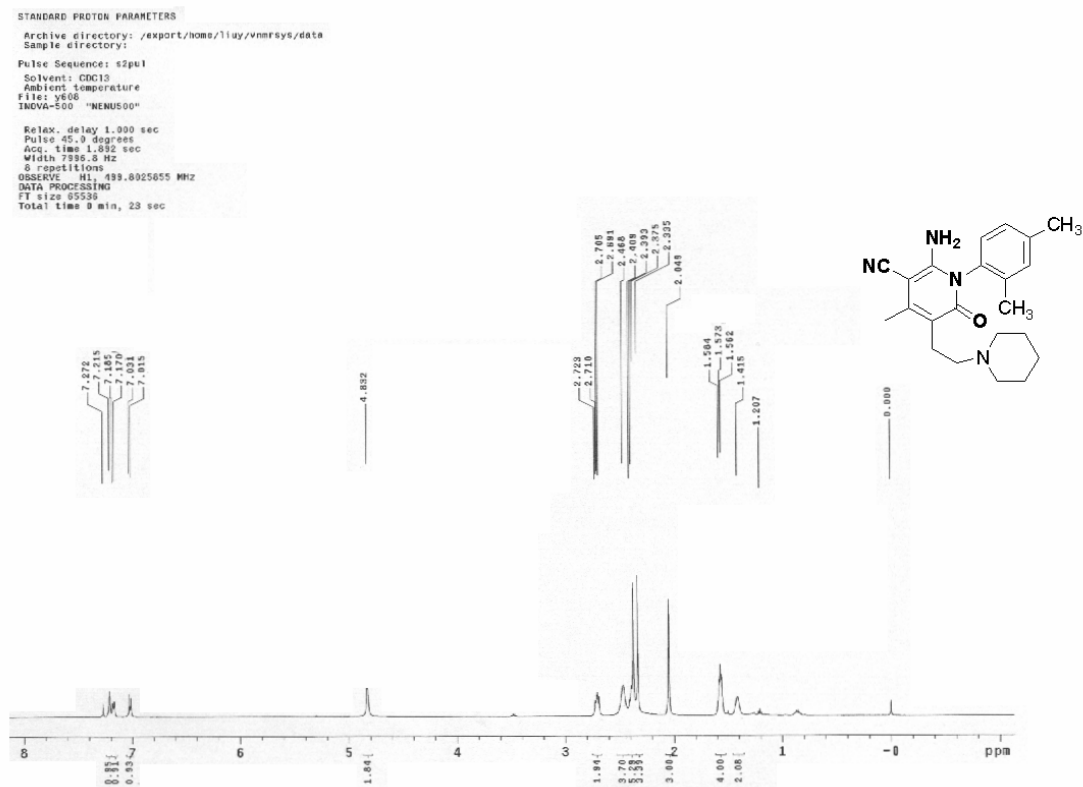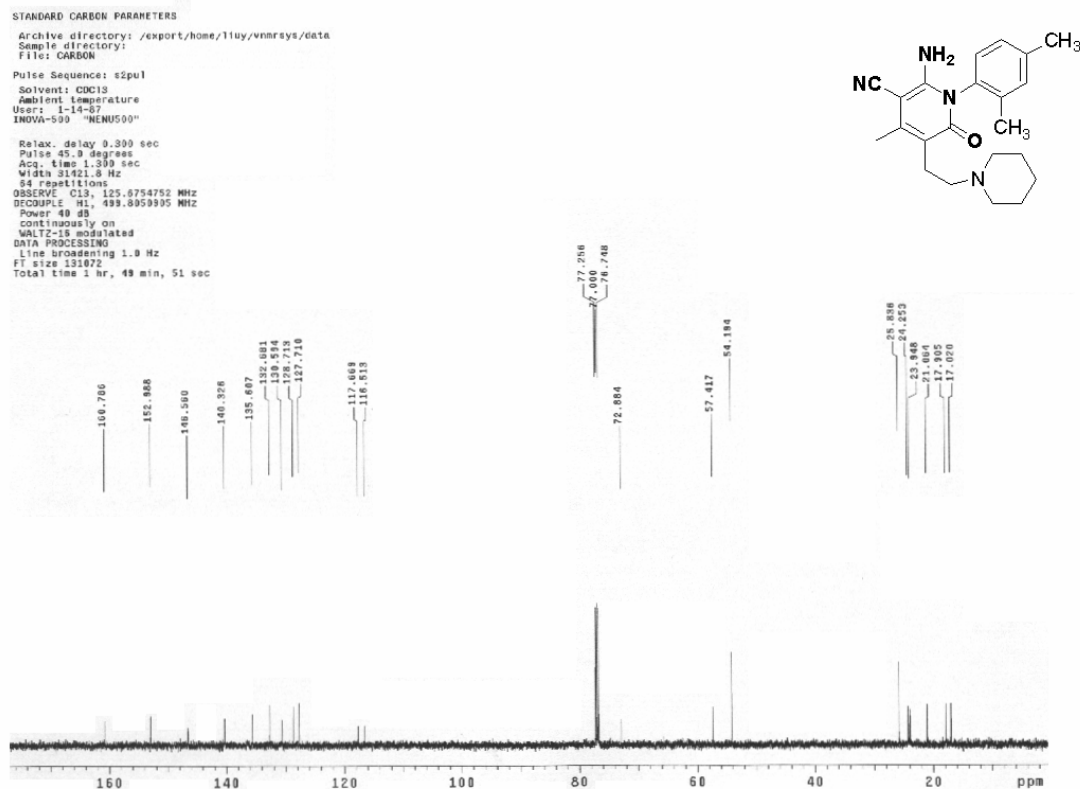

2f

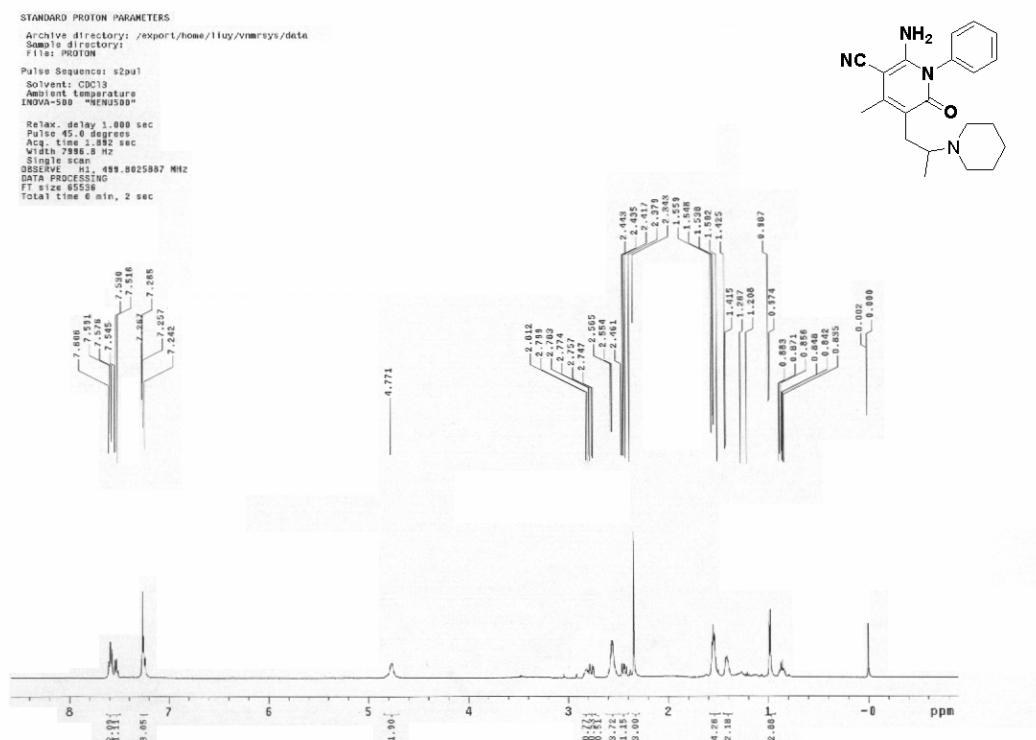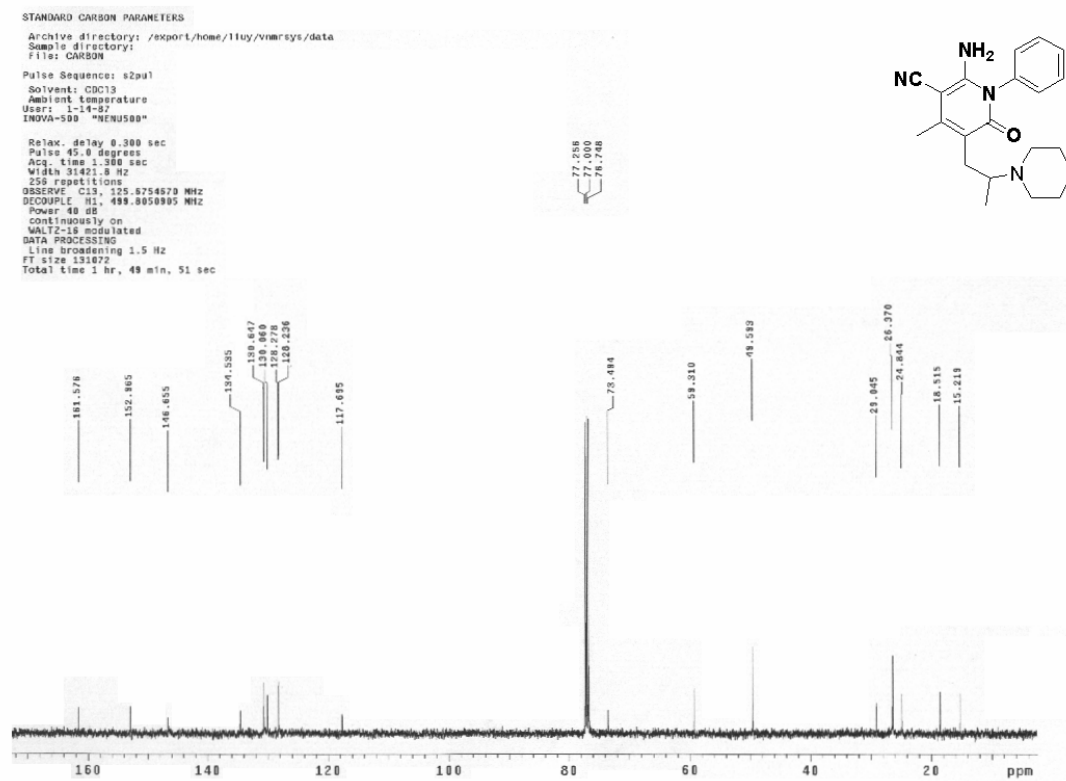

2g

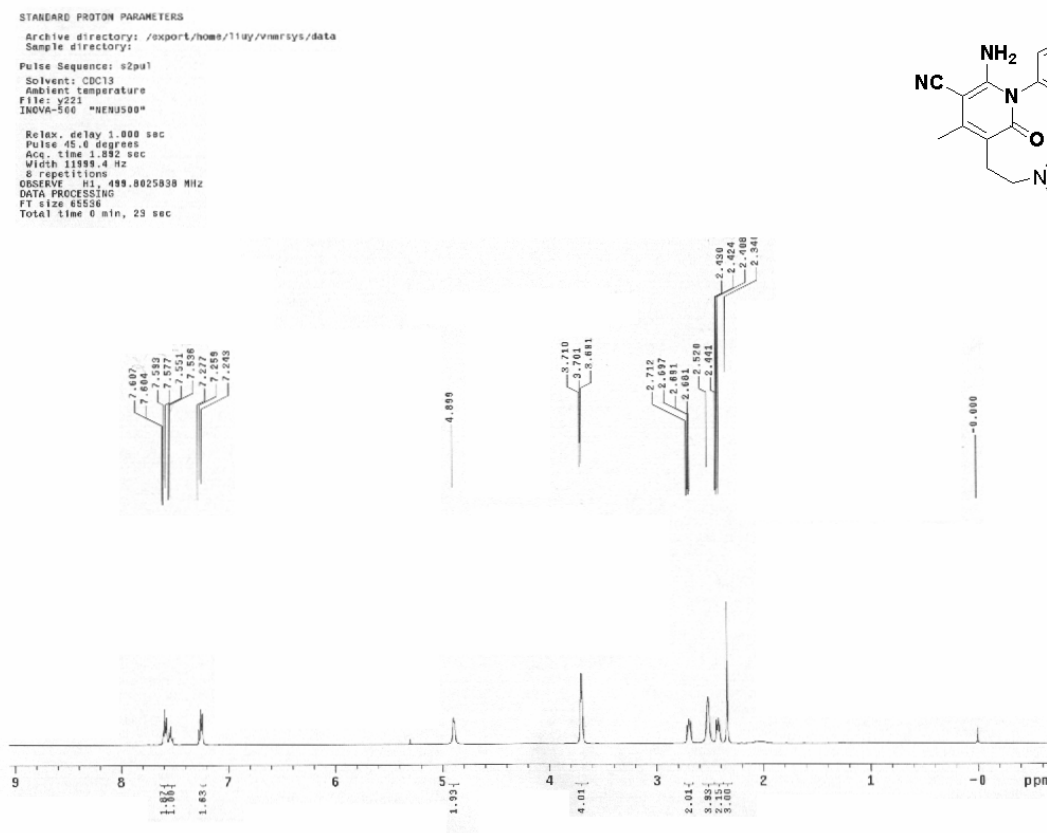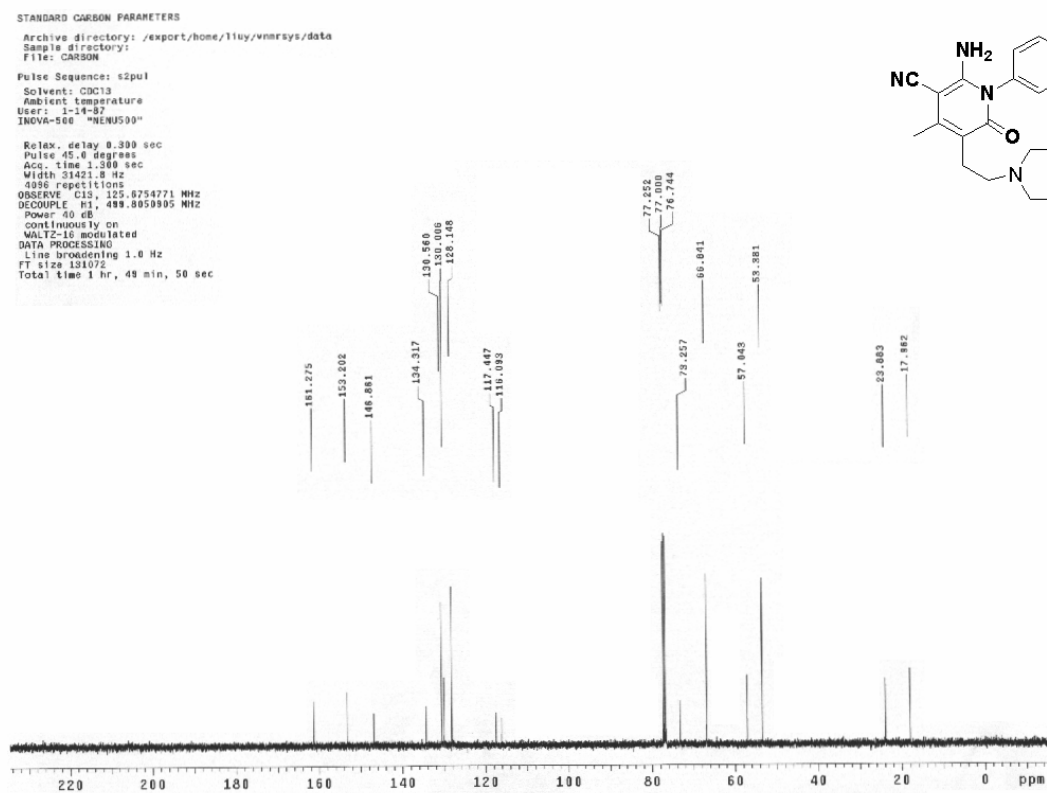

2h

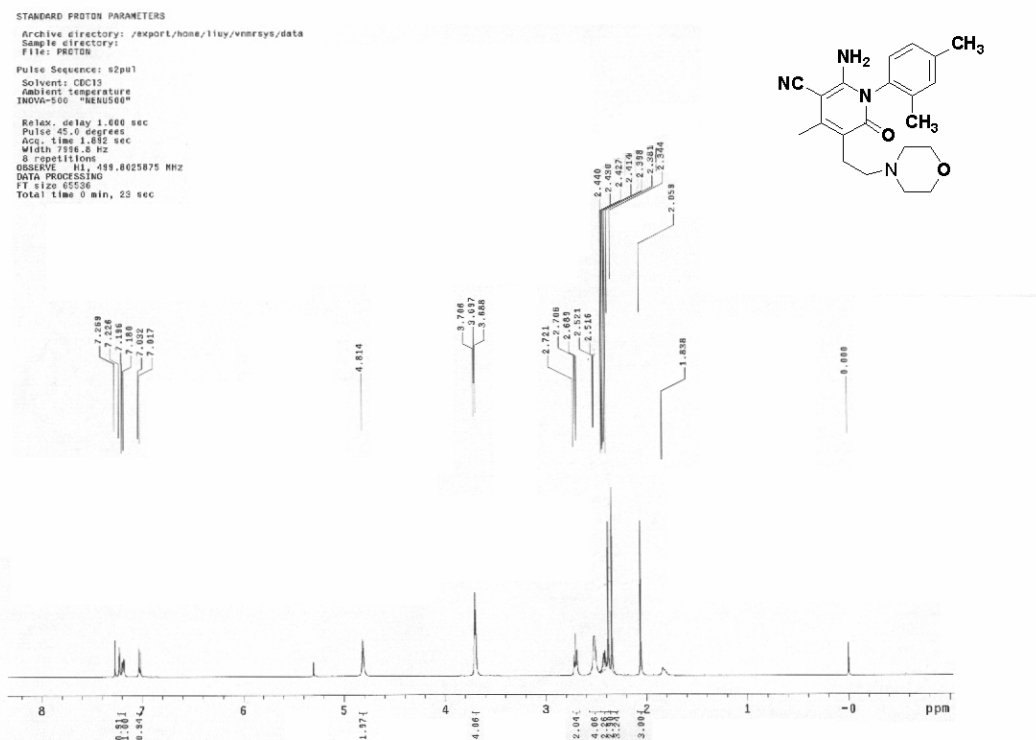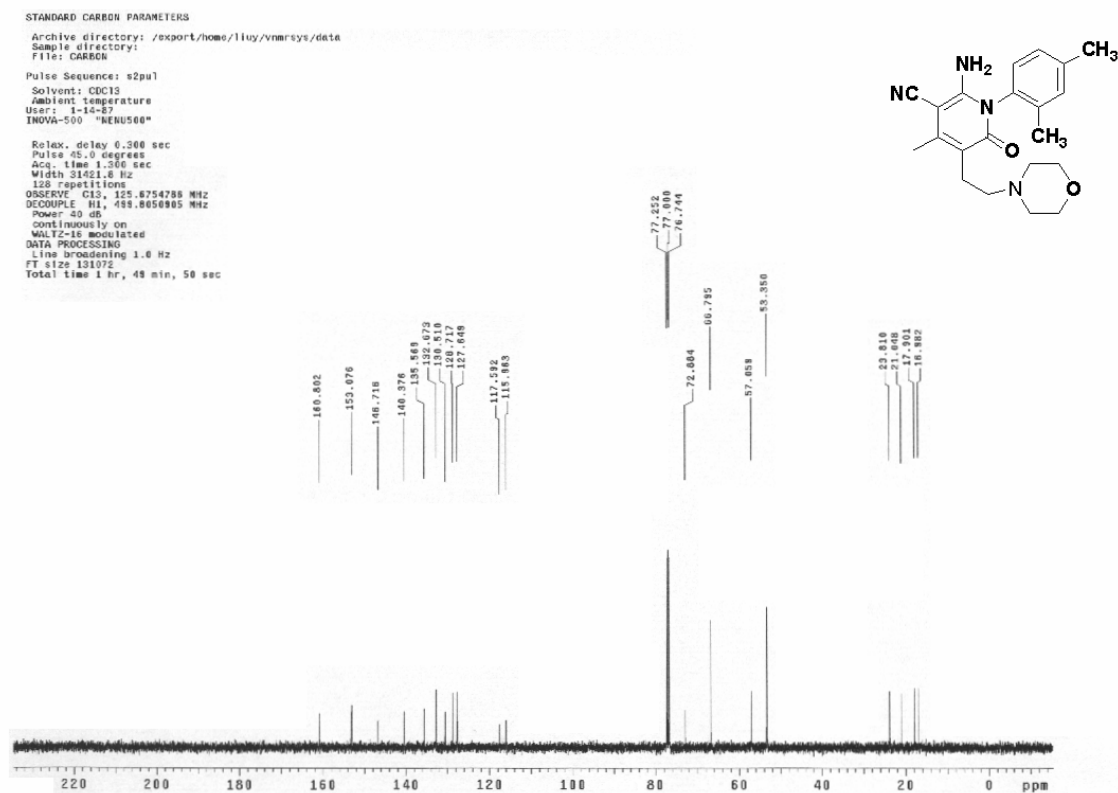

2i

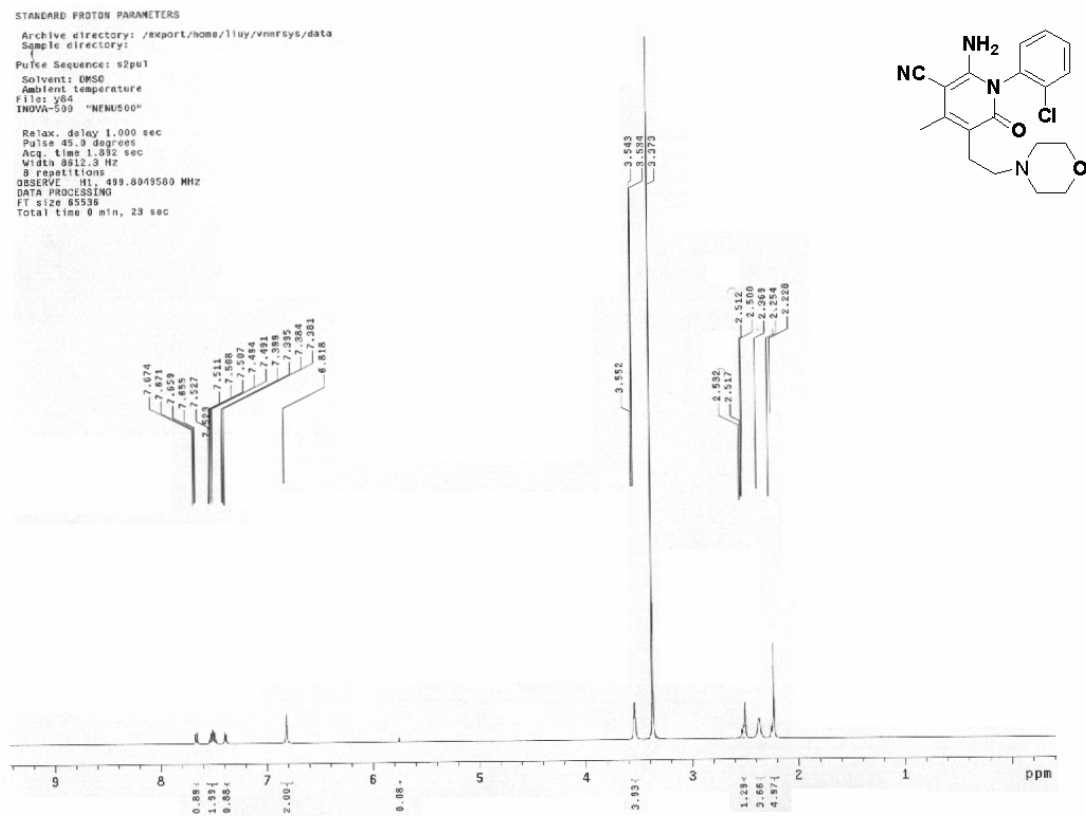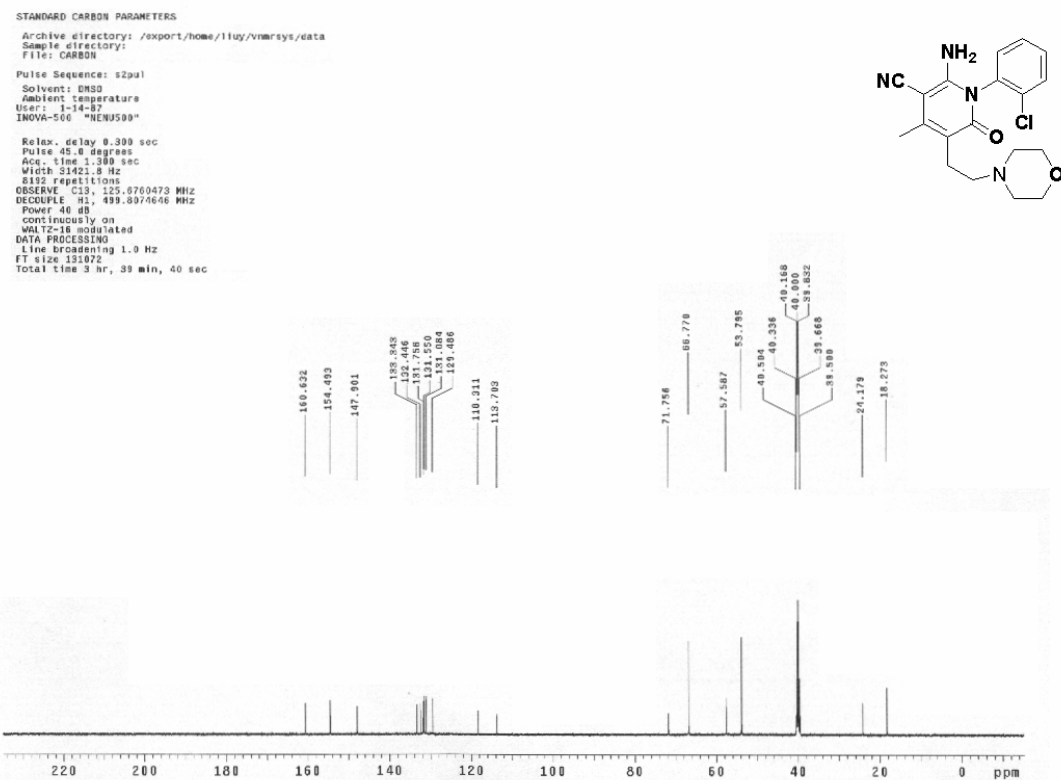



2j

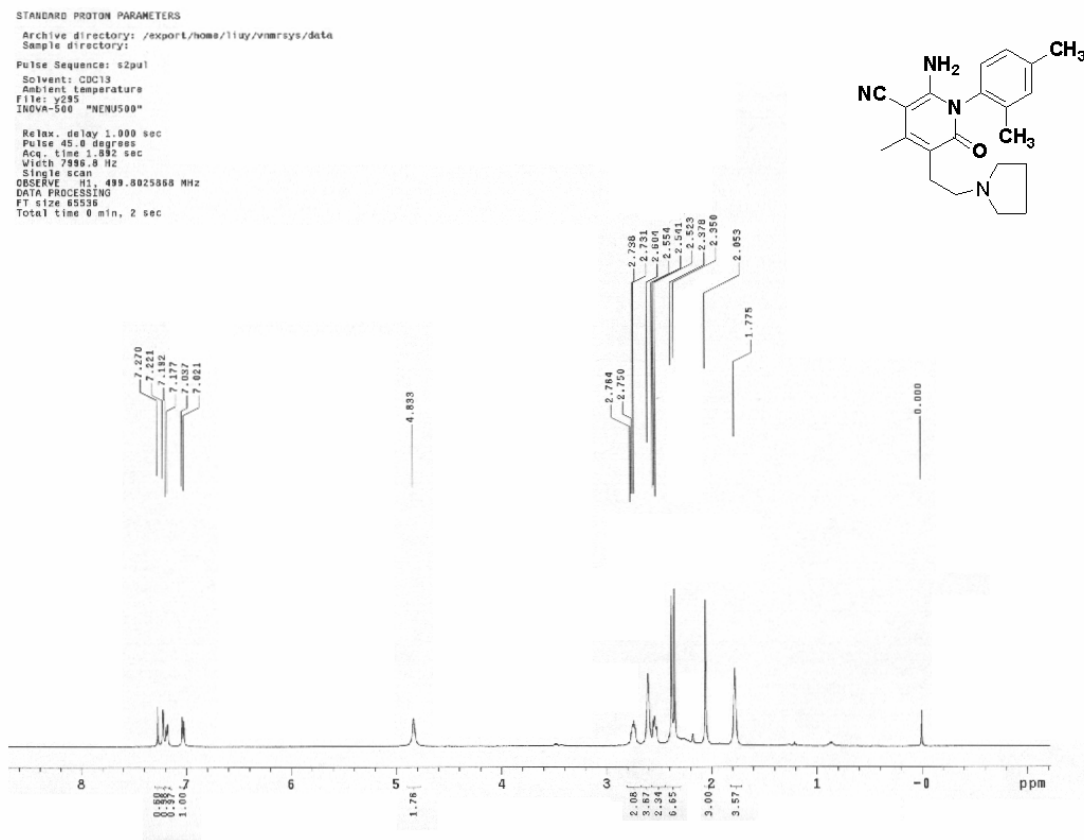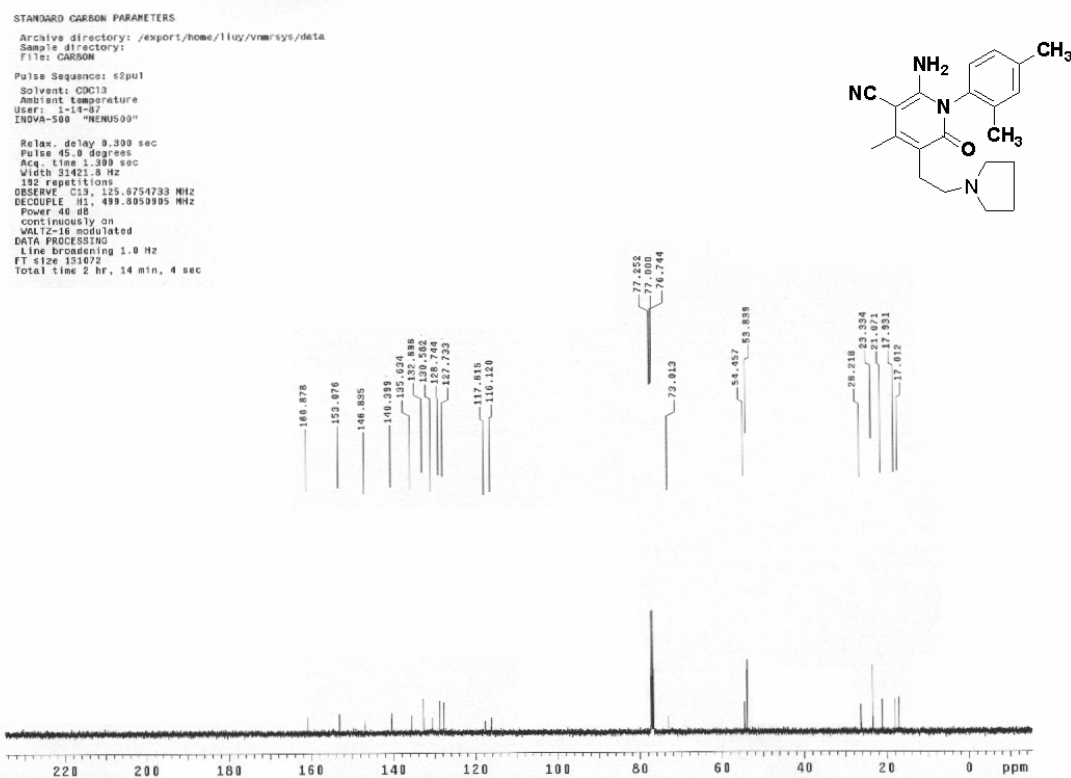

3a

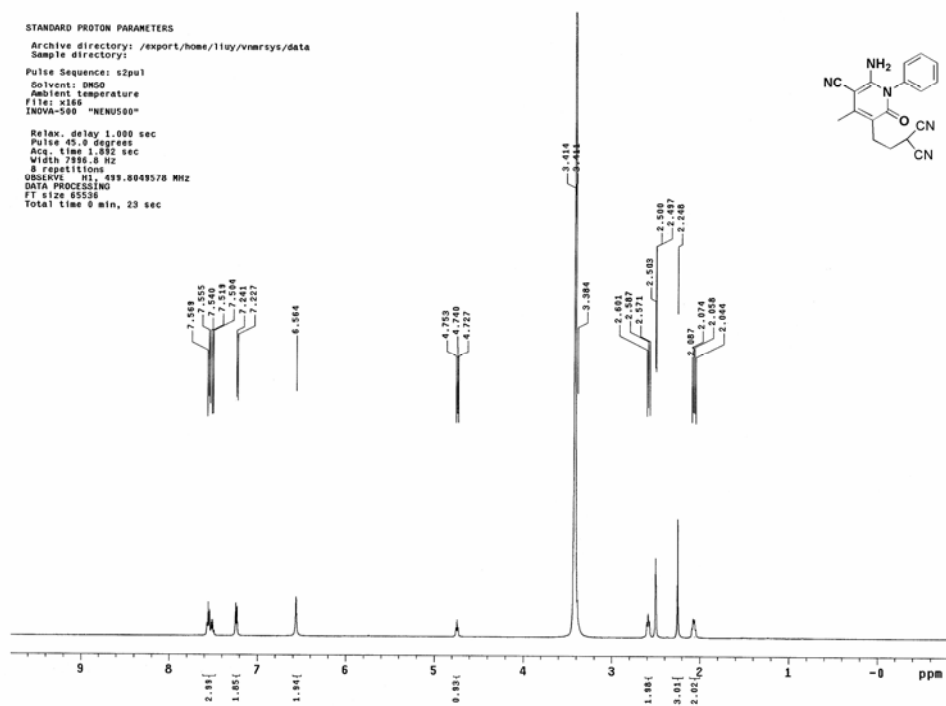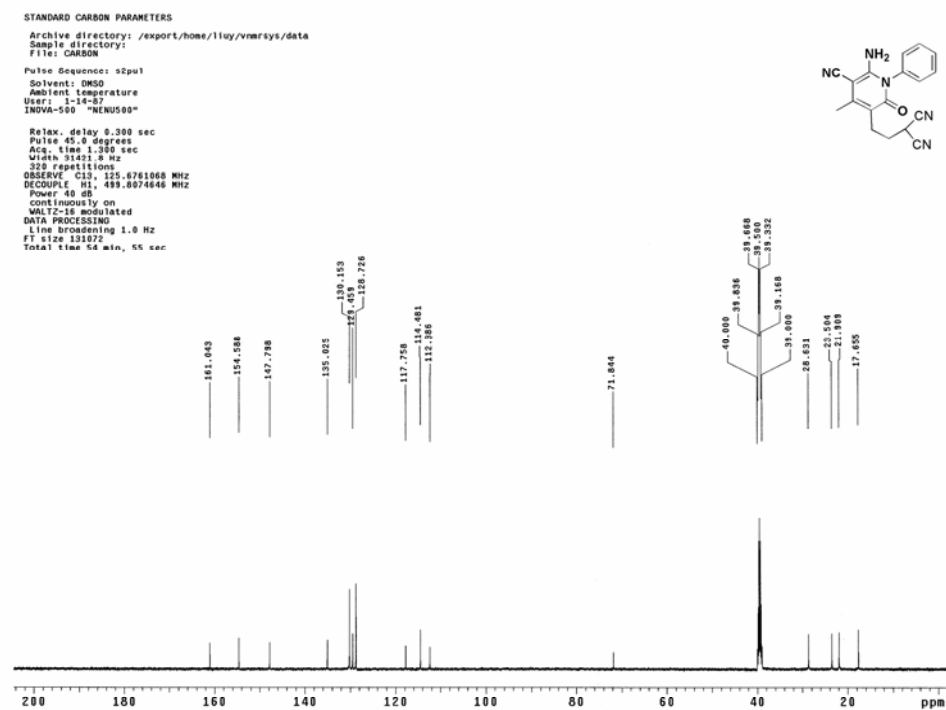

3b

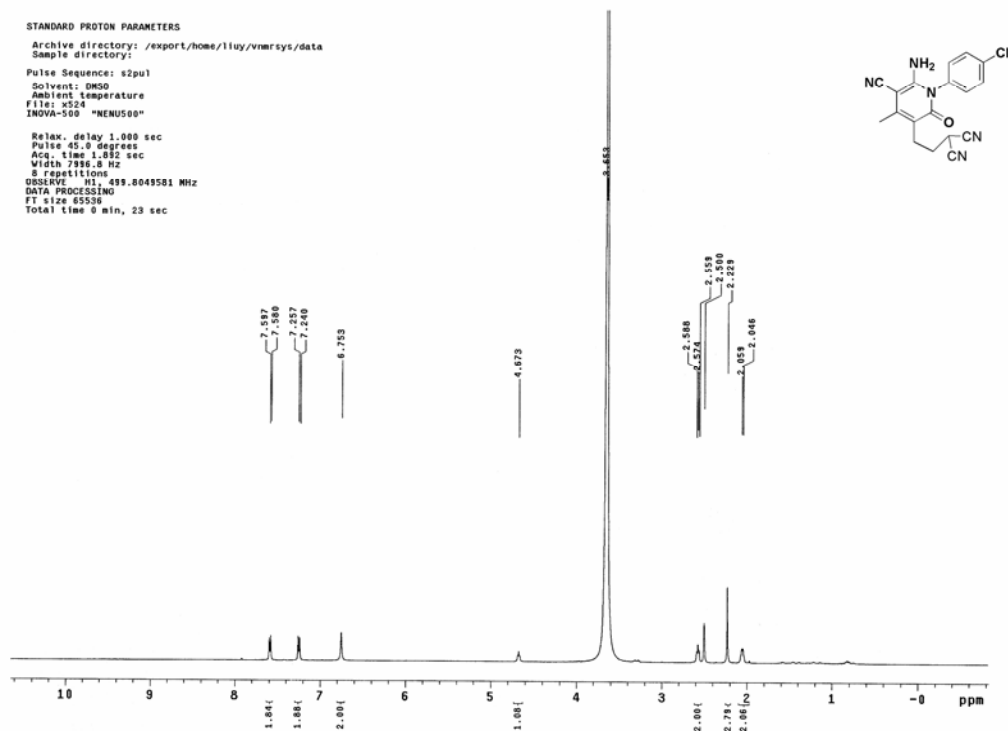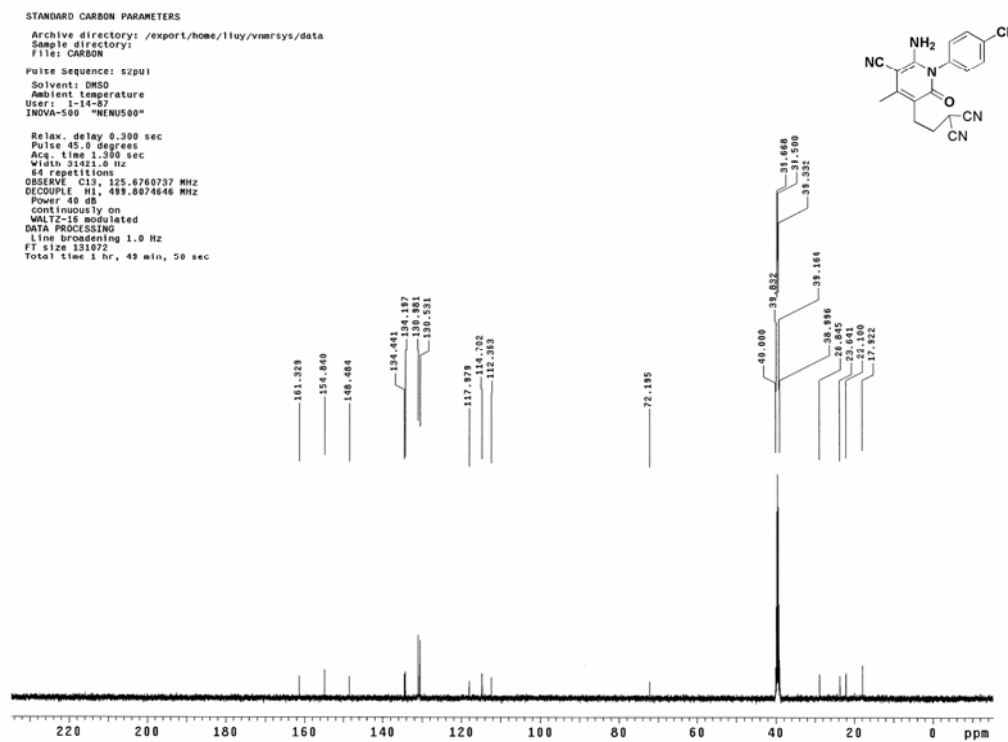

3c

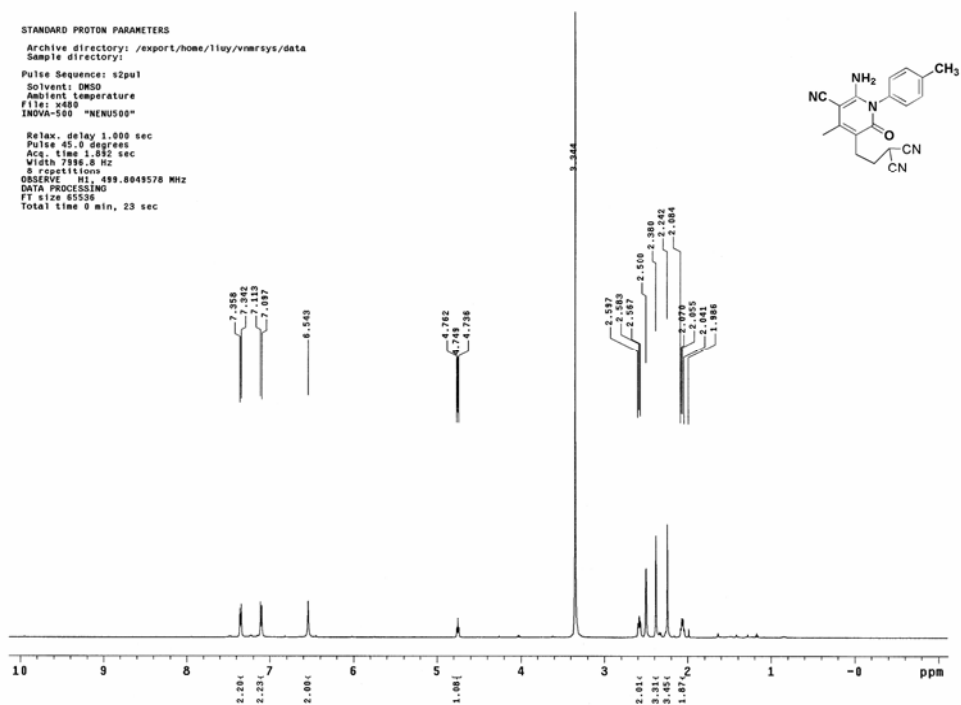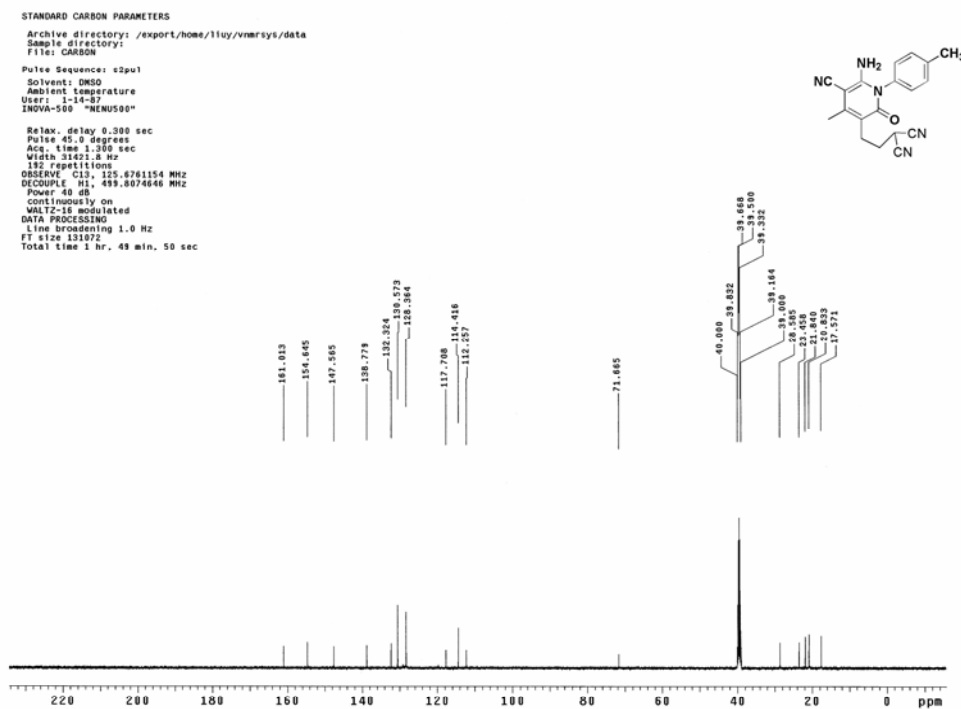

3d

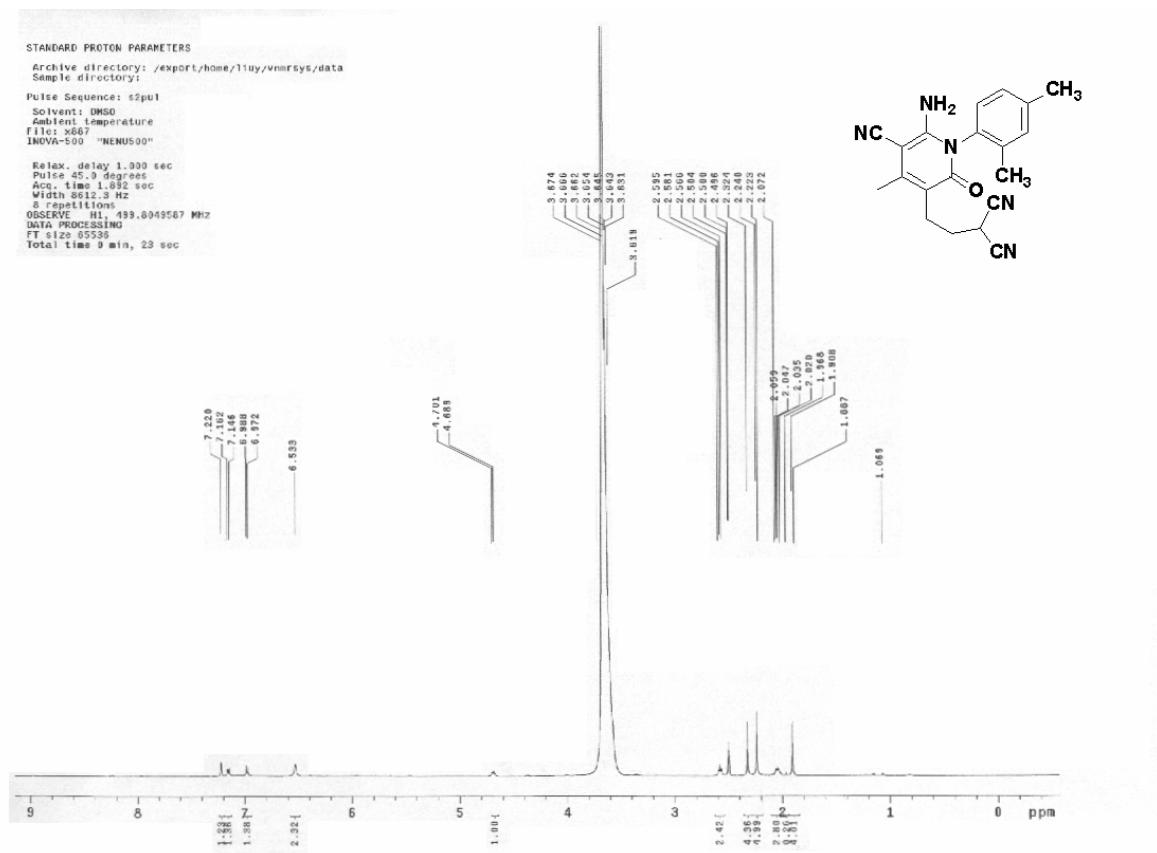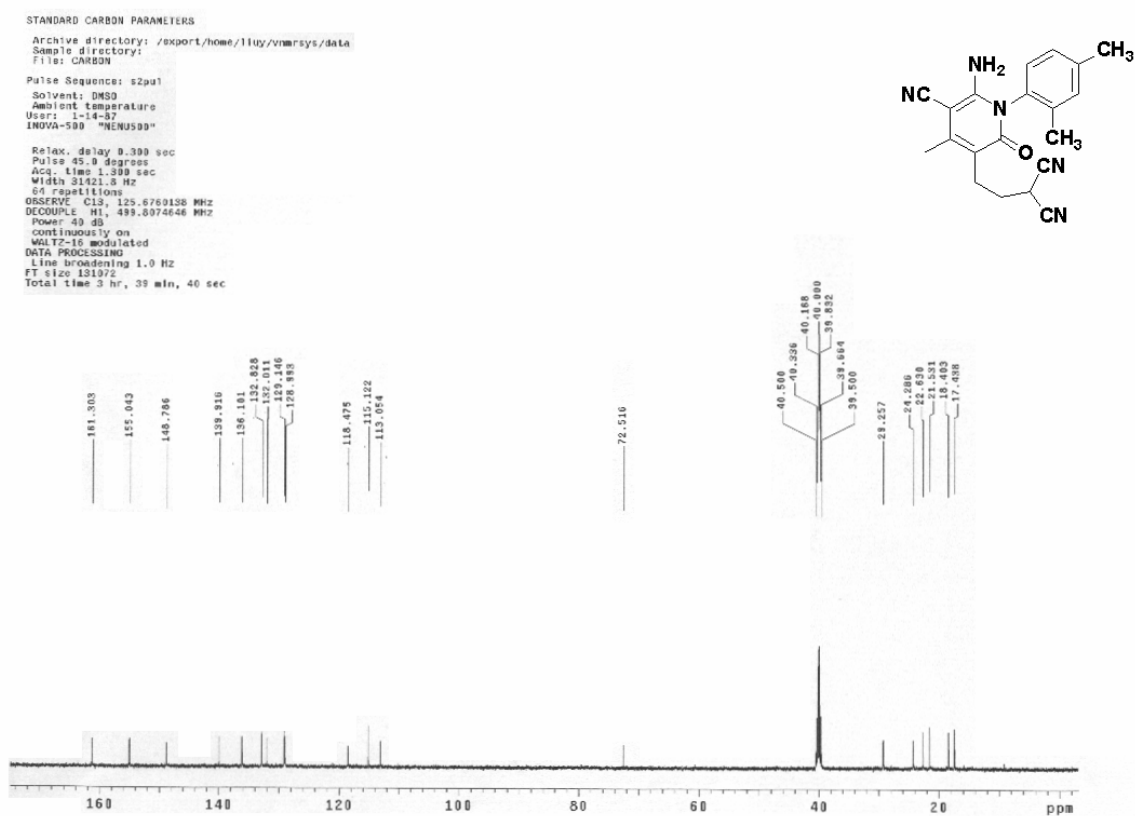

3e

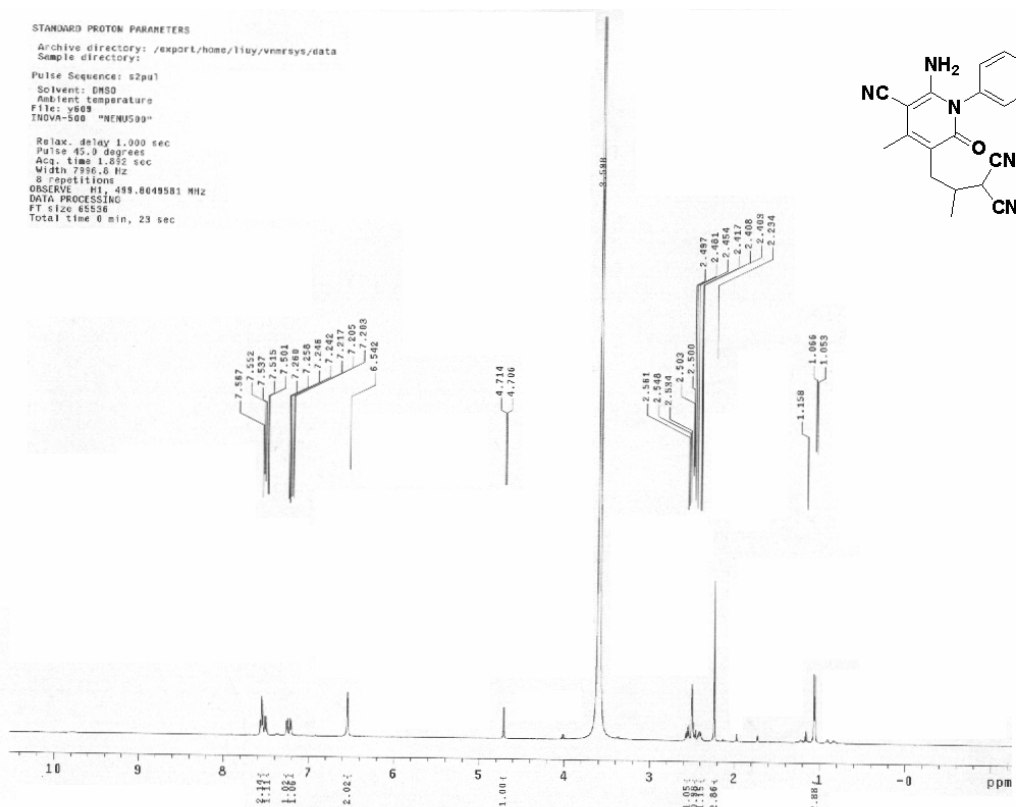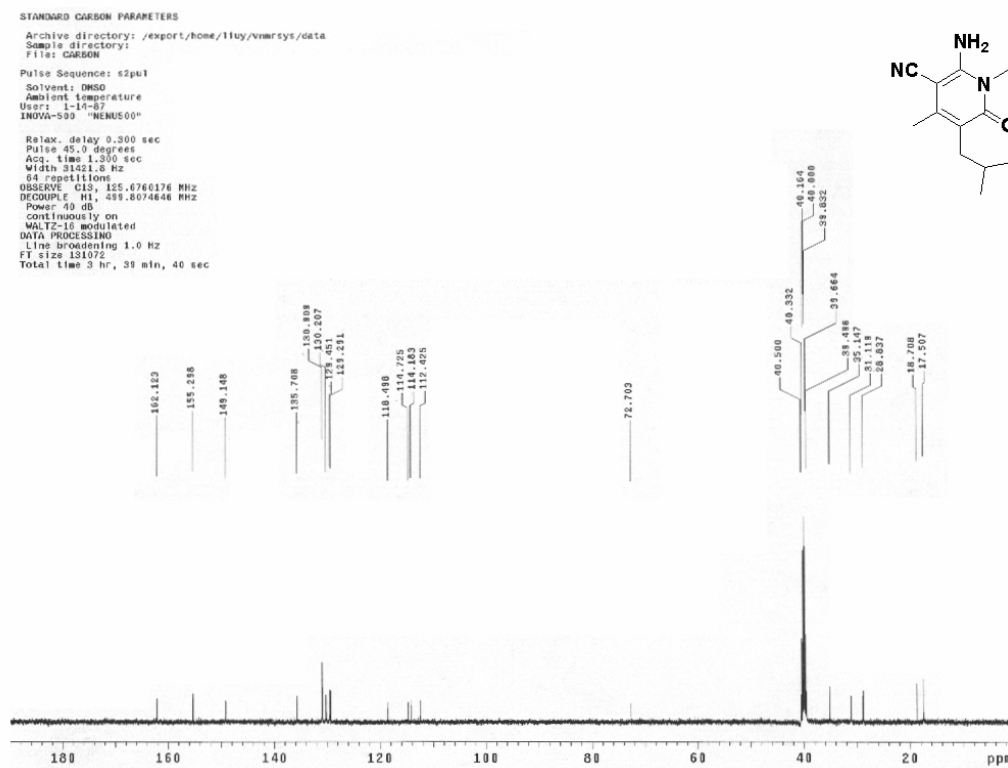

3f

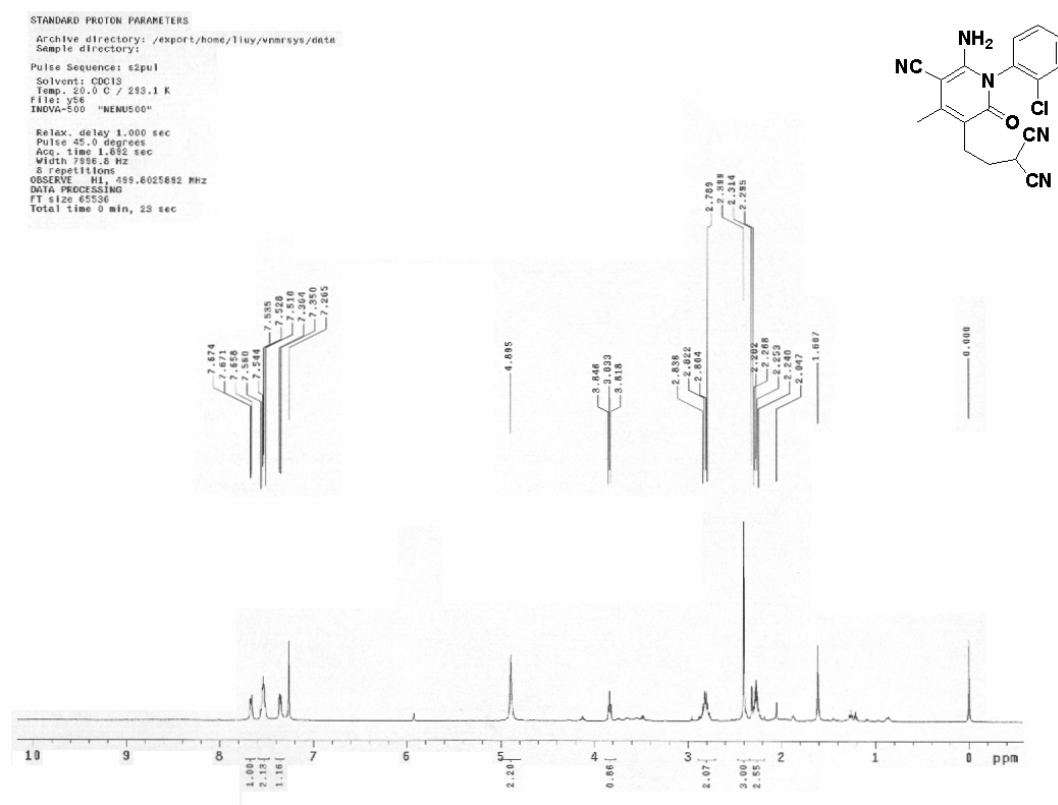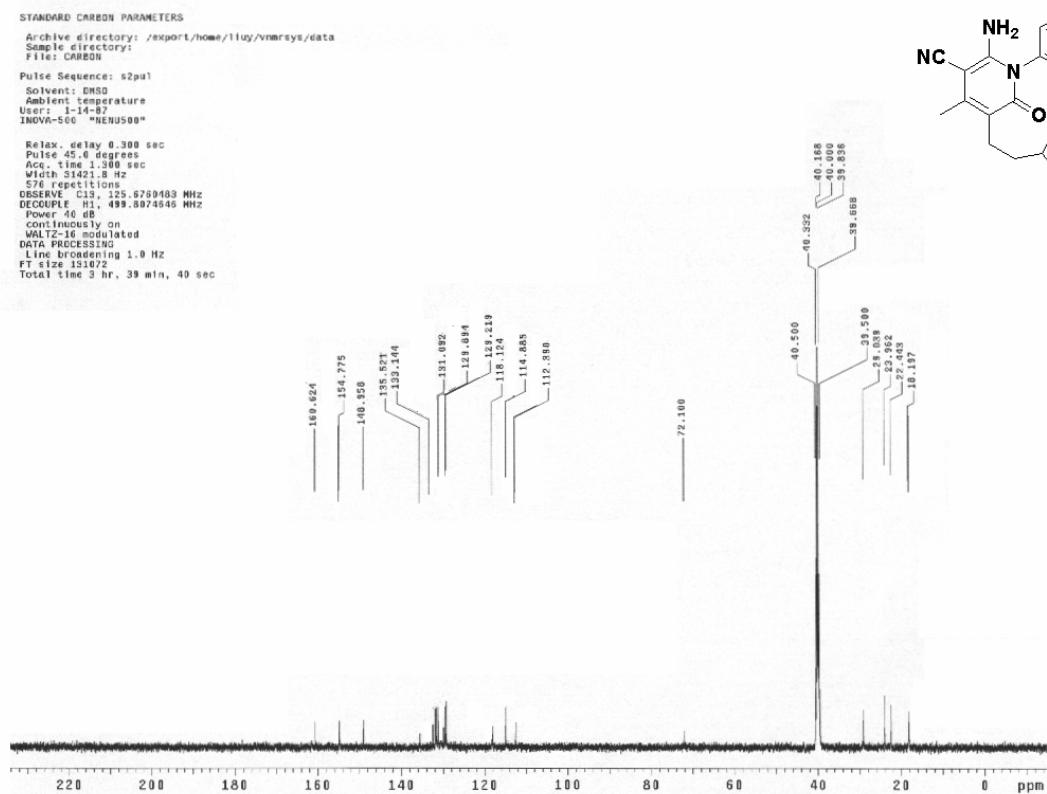

4b

STANDARD PROTON PARAMETERS

Archive directory: /export/home/ouyy/vnmrsys/data  
Sample directory:  
File: PROTON  
Pulse Sequence: s2pul  
Solvent: CDCl3  
Ambient Temperature  
INOVA-500 "MENUM500"  
Relax. delay 1.000 sec  
Pulse 45.0 degree  
Acq. time 1.992 sec  
Width 7386.8 Hz  
8 repetitions  
OBSERVE H1, 499.8925891 MHz  
DATA PROCESSING  
F1 size 85536  
Total time 0 min, 23 sec

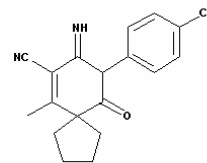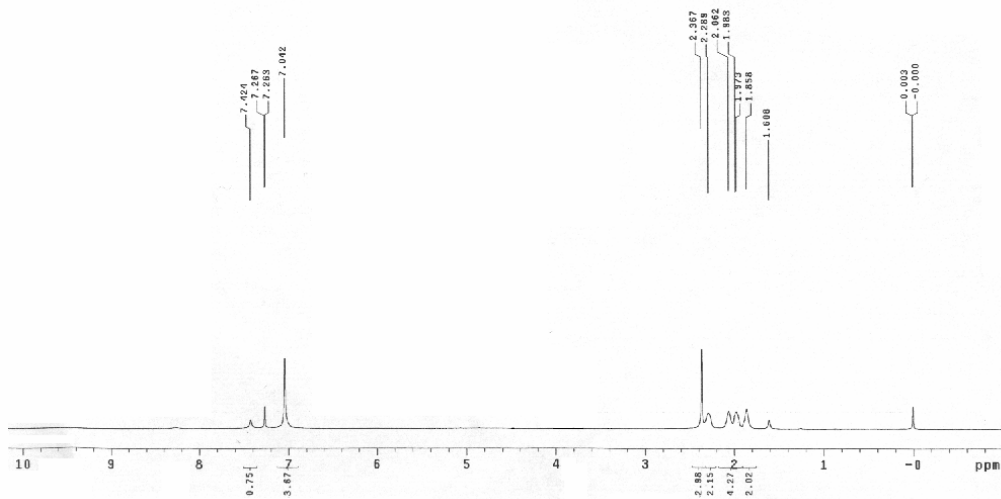

STANDARD CARBON PARAMETERS

Archive directory: /export/home/lluy/vnmrsys/data  
Sample directory:  
File: b76  
Pulse Sequence: s2pul  
Solvent: CDCl3  
Ambient Temperature  
User: 1-14-07  
File: b76  
INOVA-500 "MENUM500"  
Relax. delay 0.300 sec  
Pulse 45.0 degree  
Acc. time 0.800 sec  
Width 31421.8 Hz  
13C repetitions  
OBSERVE C13, 125.6754870 MHz  
DECOUPLE H1, 499.8650865 MHz  
Power 40 dB  
continuously on  
WALTZ-16 modulated  
DATA PROCESSING  
Line broadening 1.5 Hz  
F1 size 85536  
Total time 1 hr, 22 min, 31 sec

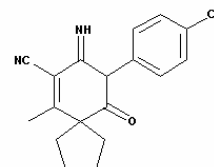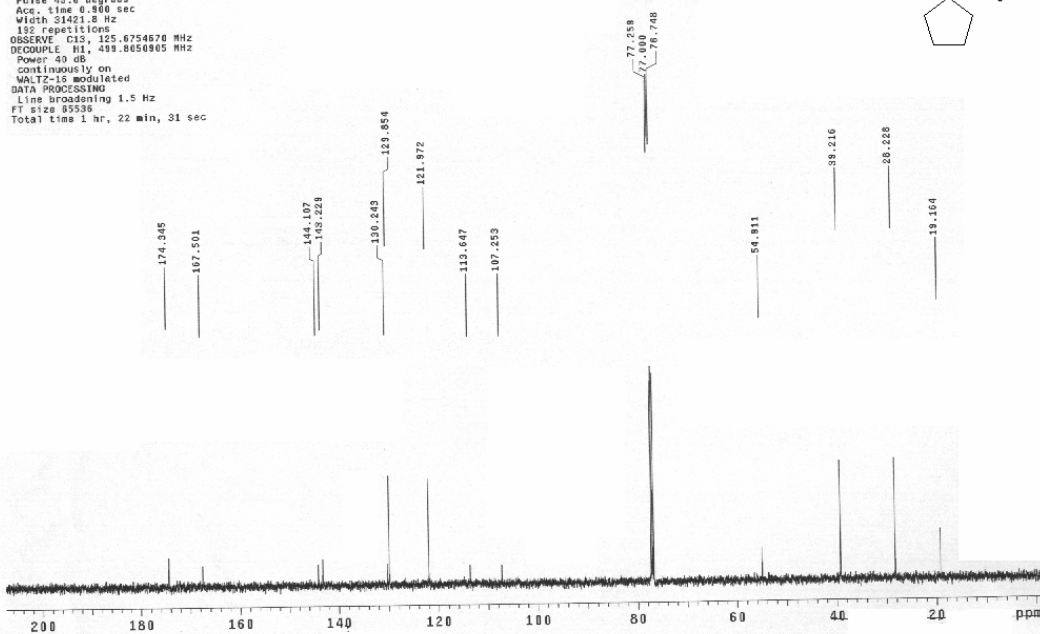



4c

STANDARD PROTON PARAMETERS  
Archive directory: /export/home/ouyy/vnmrsys/data  
Sample directory:  
File: PROTON  
Pulse Sequence: s2pu1  
Solvent: CDCl3  
Ambient temperature  
INOVA-500 "NENU500"  
Relax. delay 1.000 sec  
Pulse 45.0 degree  
Acq. time 1.092 sec  
Width 7895.8 Hz  
3 repetitions  
OBSERVE H1, 499.8025894 MHz  
DATA PROCESSING  
F1 size 65536  
Total time 8 min, 23 sec

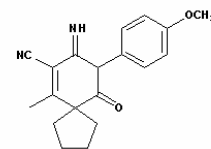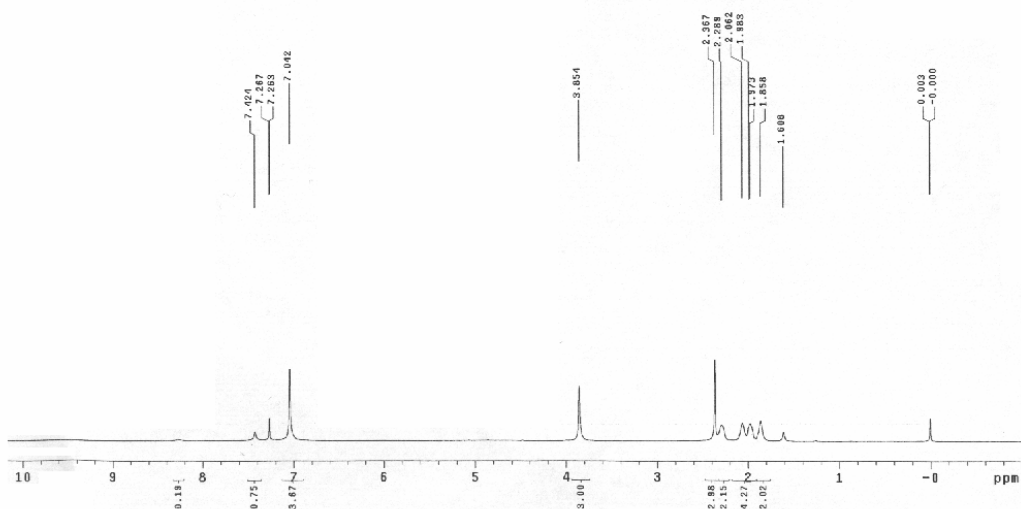

STANDARD CARBON PARAMETERS  
Archive directory: /export/home/11ay/vnmrsys/data  
Sample directory:  
File: CARBON  
Pulse Sequence: s2pu1  
Solvent: CDCl3  
Ambient temperature  
User: 1-14-07  
INOVA-500 "NENU500"  
Relax. delay 1.000 sec  
Pulse 45.0 degree  
Acq. time 1.388 sec  
Width 31421.8 Hz  
320 repetitions  
OBSERVE C13, 125.6754316 MHz  
DECUPLE H1, 499.8050905 MHz  
Power 46 dB  
continuously on  
WALTZ-16 modulated  
DATA PROCESSING  
Line broadening 1.0 Hz  
F1 size 151072  
Total time 3 hr, 12 min, 26 sec

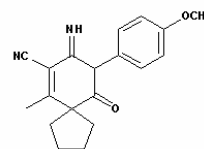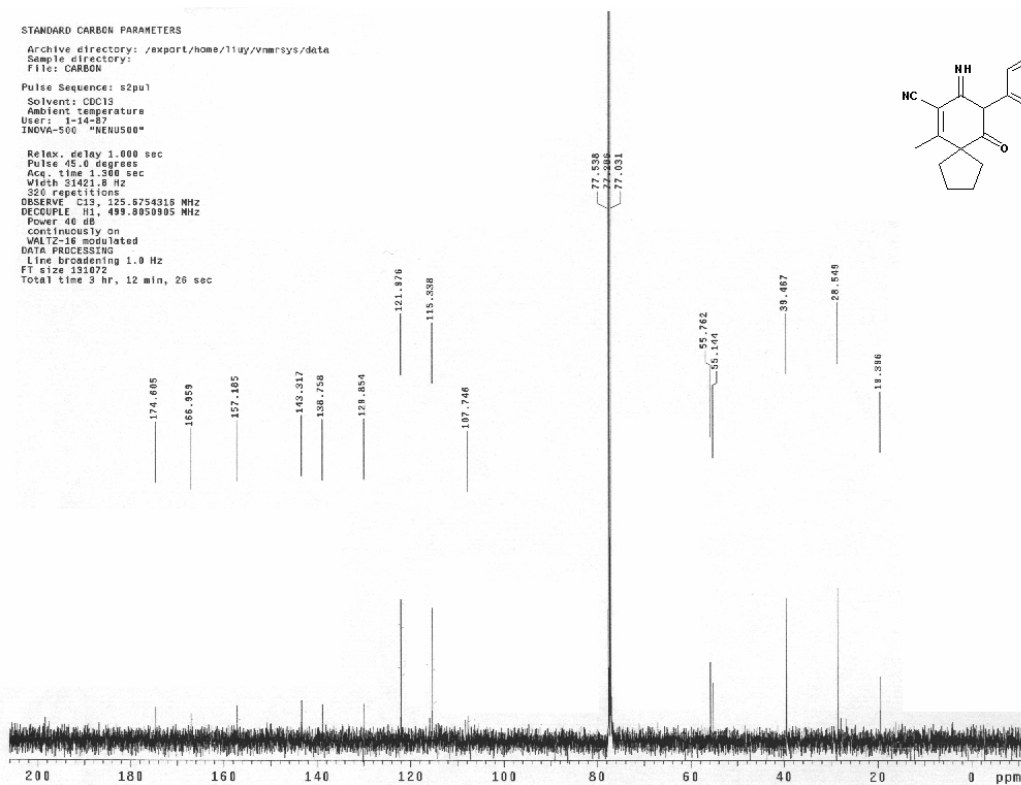

5a

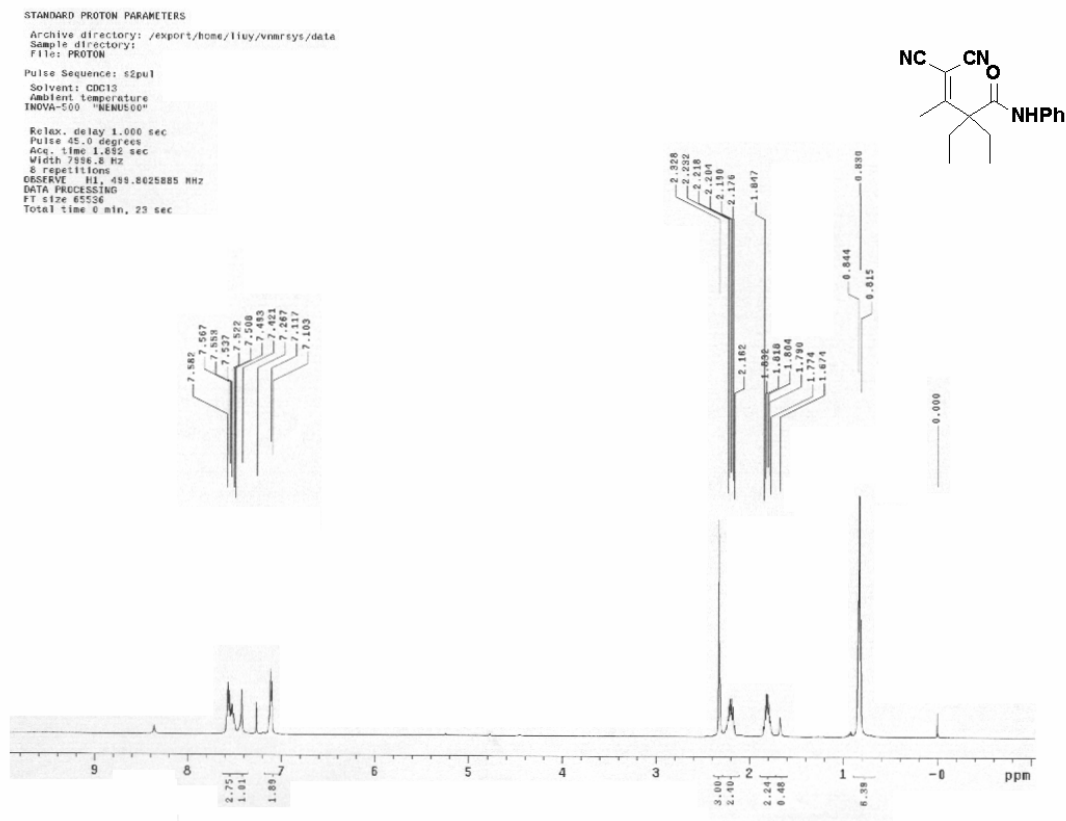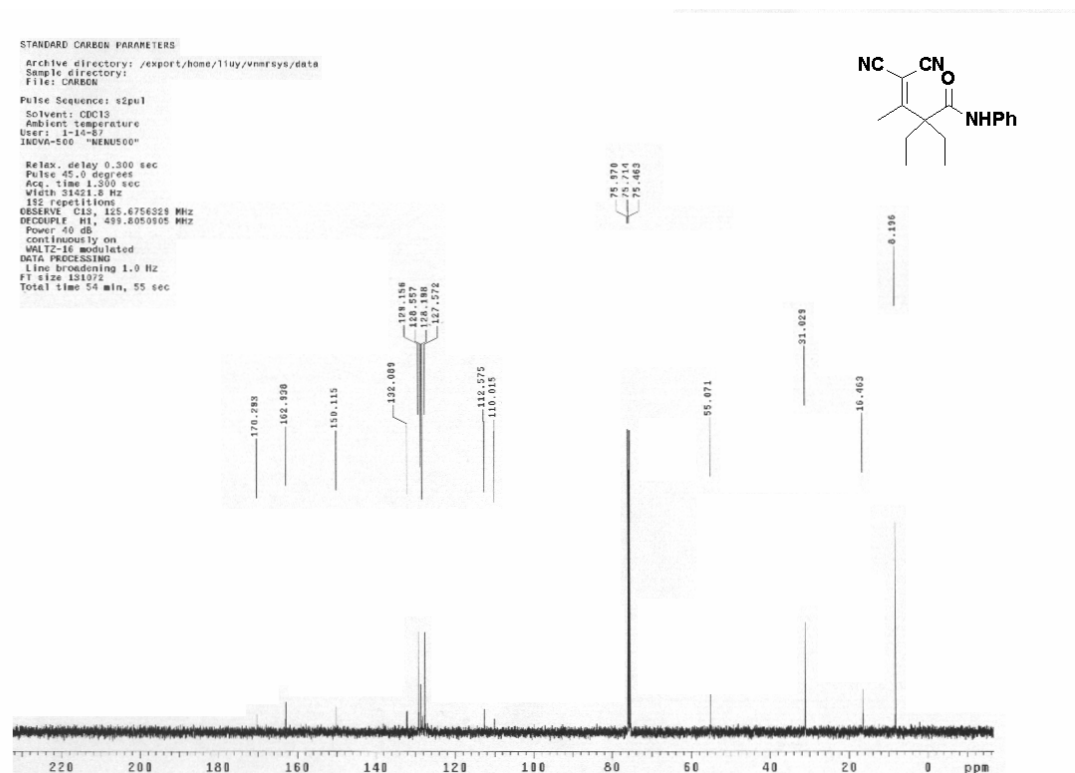

5b

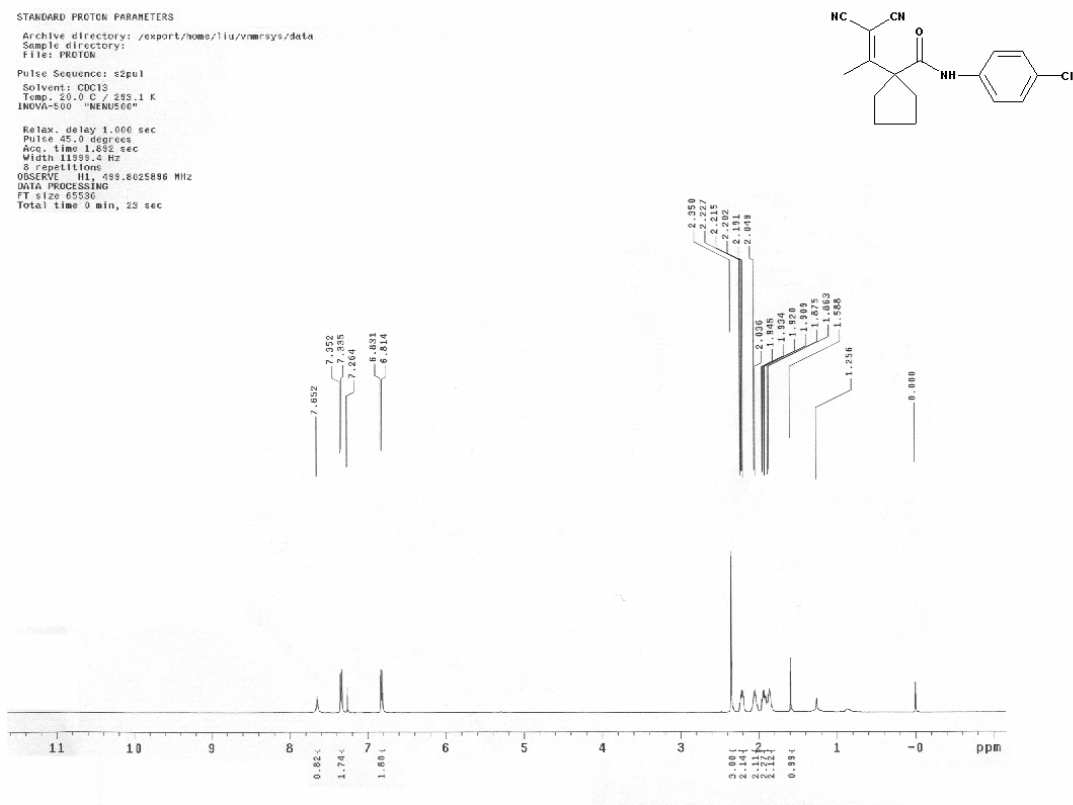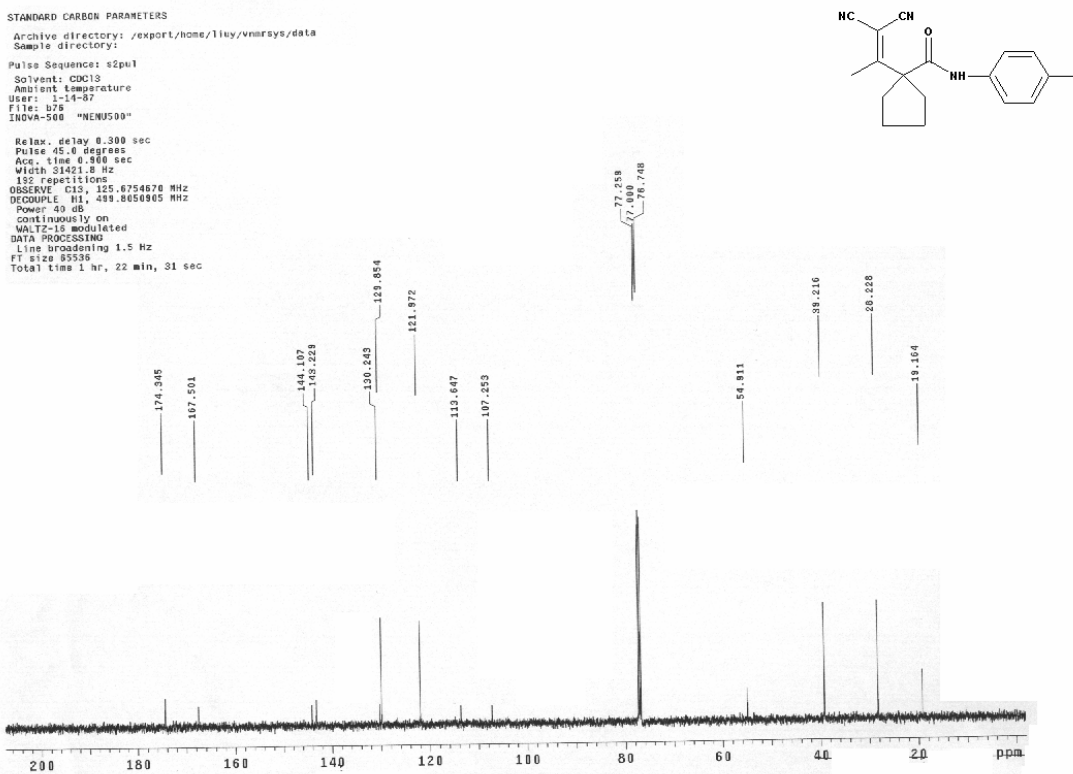

5c

STANDARD PROTON PARAMETERS

Archive directory: /export/home/ouyy/vnmrsys/data  
 Sample directory:  
 Pulse Sequence: s2pu1  
 Solvent: CDCl3  
 Ambient temperature  
 File: t030  
 INOVA-500 "NENU500"  
 Relax. delay 1.000 sec  
 Pulse 45.0 degrees  
 Acq. time 1.892 sec  
 Width 7596.0 Hz  
 8 repetitions  
 OBSERVE H1, 499.8025894 MHz  
 DATA PROCESSING  
 FT size 65536  
 Total time 0 min, 29 sec

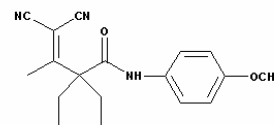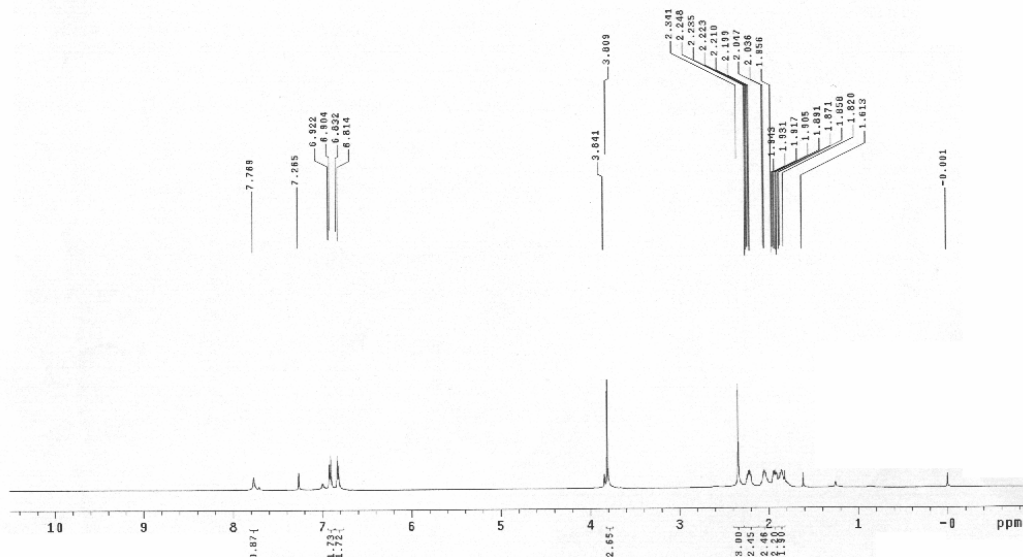

STANDARD CARBON PARAMETERS

Archive directory: /export/home/11uy/vnmrsys/data  
 Sample directory:  
 File: CARBON  
 Pulse Sequence: s2pu1  
 Solvent: CDCl3  
 Ambient temperature  
 User: 1-14-07  
 INOVA-500 "NENU500"  
 Relax. delay 1.000 sec  
 Pulse 45.0 degrees  
 Acq. time 1.300 sec  
 Width 31421.8 Hz  
 320 repetitions  
 OBSERVE C13, 125.8754315 MHz  
 DECOUPLE H1, 499.8050905 MHz  
 Power 0.8  
 Continuously on  
 WALTZ-16 modulated  
 DATA PROCESSING  
 Line broadening 1.0 Hz  
 FT size 131872  
 Total time 3 hr, 12 min, 26 sec

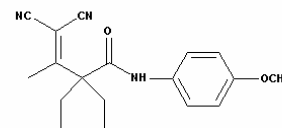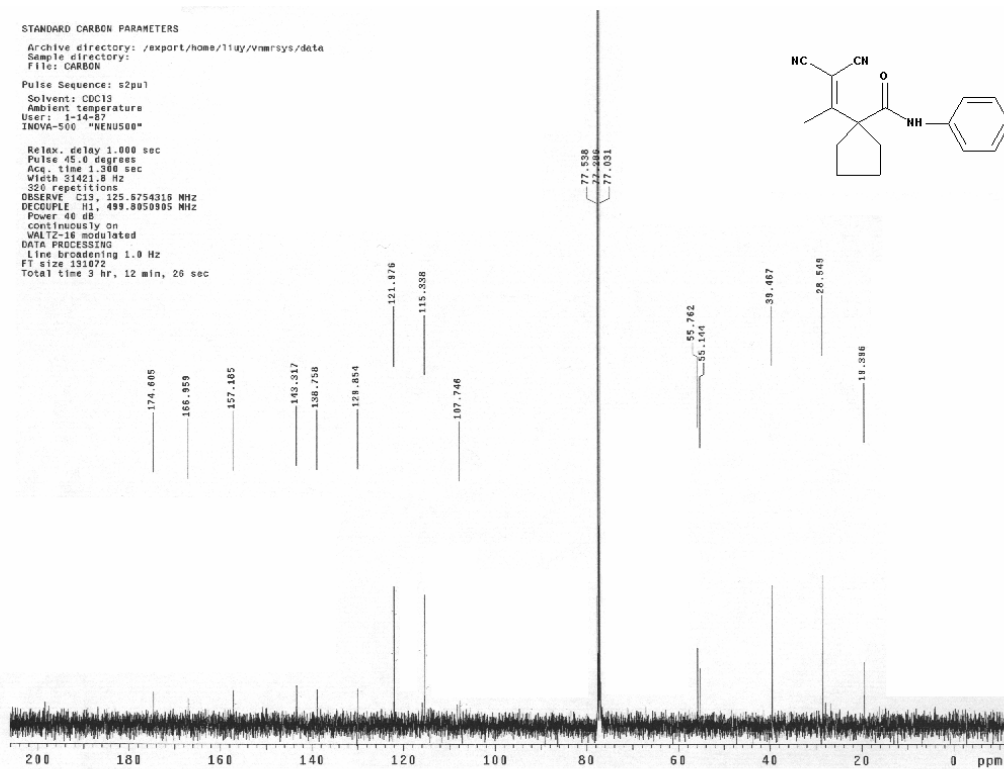

Supplement: b905742k.pdf [file b905742k.pdf]
